# Supplementary material for: Palladium-catalyzed carbonylative synthesis of aryl esters from p-benzoquinones and aryl triflates
Source: Royal Society of Chemistry journal article supplement (doi:10.1039/d1ob01400e), 2021-01-01

## Supporting Information

### Palladium-Catalyzed Carbonylative Synthesis of Aryl Esters from *p*- Benzoquinones and Aryl Triflates

Siqi Wang,<sup>a</sup> Jian-Shu Wang,<sup>a</sup> Zhengjie Le,<sup>a</sup> Jun Ying,<sup>\*,a</sup> and Xiao-Feng Wu<sup>\*,b</sup>

<sup>a</sup> Department of Chemistry, Key Laboratory of Surface & Interface Science of Polymer Materials of Zhejiang Province, Zhejiang Sci-Tech University, Hangzhou 310018, China.

<sup>b</sup> Dalian National Laboratory for Clean Energy, Dalian Institute of Chemical Physics, Chinese Academy of Sciences, 116023 Dalian, Liaoning, China. Leibniz-Institut für Katalyse e. V. an der Universität Rostock, Albert-Einstein-Straße 29a, 18059 Rostock, Germany.

\*E-mail: yingjun@zstu.edu.cn

\*E-mail: xiao-feng.wu@catalysis.de

### Table of Contents

|                                                                                            |     |
|--------------------------------------------------------------------------------------------|-----|
| 1. General experimental information .....                                                  | S1  |
| 2. General procedure for the carbonylative synthesis of aryl esters (3aa-at, 3bb-fb) ..... | S1  |
| 3. Characterization data of products (3aa-at, 3bb-fb) .....                                | S2  |
| 4. Reference .....                                                                         | S11 |
| 5. <sup>1</sup> H, <sup>13</sup> C NMR spectra of products (3aa-at, 3bb-fb) .....          | S12 |

## 1. General experimental information

Unless otherwise noted, all reactions were carried out under nitrogen atmosphere. All commercially available reagents were used without further purification. All of the solvents were treated according to known methods. Column chromatography was performed on silica gel (200-400 mesh).  $^1\text{H}$  NMR (400 MHz) chemical shifts were reported in ppm ( $\delta$ ) relative to tetramethylsilane (TMS) with the solvent resonance employed as the internal standard.  $^{13}\text{C}$  NMR (100 MHz) chemical shifts were reported in ppm ( $\delta$ ) from tetramethylsilane (TMS) with the solvent resonance as the internal standard. Data were reported as follows: chemical shift, multiplicity (s = singlet, d = doublet, t = triplet, q = quartet, dd = doublet of doublets, td = triplet of doublets, qd = quartet of doublets, m = multiplet), coupling constants (Hz) and integration. HRMS measurements were obtained on a TOF analyzer.

## 2. General procedure for the carbonylative synthesis of aryl esters (3aa-at, 3bb-fb)

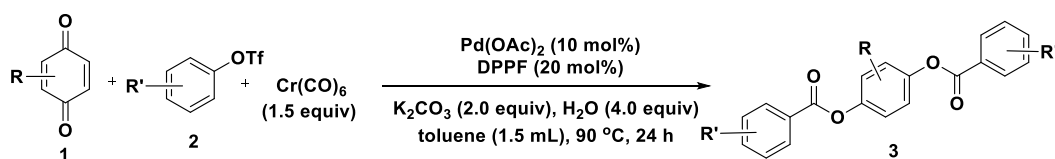

$\text{Pd}(\text{OAc})_2$  (4.5 mg, 10 mol%), DPPF (22.2 mg, 20 mol%),  $\text{Cr}(\text{CO})_6$  (66.1 mg, 0.3 mmol, 1.5 equiv), a *p*-benzoquinone **1** (24.4 mg, 0.2 mmol),  $\text{K}_2\text{CO}_3$  (55.3 mg, 0.4 mmol, 2.0 equiv) were added to an oven-dried tube (15.0 mL) which was then placed under vacuum and refilled with nitrogen three times. Then an aryl triflate **2** (0.2 mmol),  $\text{H}_2\text{O}$  (14.4 mg, 0.8 mmol, 4.0 equiv) and toluene (1.5 mL) were added into the tube via syringe. The tube was sealed and stirred at 90 °C for 24 h. Upon the reaction was completed, the resulting mixture was purified by silica gel column using chromatography (petroleum ether/ ethyl acetate = 10:1) to obtain a product **3**.

1 mmol scale:  $\text{Pd}(\text{OAc})_2$  (10 mol%), DPPF (20 mol%),  $\text{Cr}(\text{CO})_6$  (1.5 mmol, 1.5 equiv), a *p*-benzoquinone **1a** (1 mmol),  $\text{K}_2\text{CO}_3$  (2 mmol, 2.0 equiv) were added to an oven-dried tube (15.0 mL) which was then placed under vacuum and refilled with nitrogen three times. Then an aryl triflate **2b** (1 mmol),  $\text{H}_2\text{O}$  (4 mmol, 4.0 equiv) and toluene (5 mL) were added into the tube via syringe. The tube was sealed and stirred at 90 °C for 24 h. Upon the reaction was completed, the resulting mixture was purified by silica gel column using chromatography (petroleum ether/ ethyl acetate = 10:1) to obtain a product **3ab** in 72% (129.6 mg).

### 3. Characterization data of products (3aa-at, 3bb-fb)

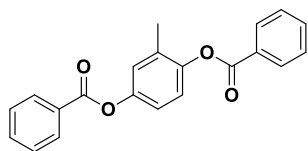

**2-methyl-1,4-phenylene dibenzoate (3aa).**<sup>1</sup> Yellow solid, 25.9 mg, 78% yield; mp.104.2-106.1 °C; <sup>1</sup>H NMR (400 MHz, CDCl<sub>3</sub>) δ 8.26 – 8.21 (m, 4H), 7.69-7.62 (m, 2H), 7.58-7.48 (m, 4H), 7.26-7.10 (m, 3H), 2.28 (s, 3H); <sup>13</sup>C NMR (100 MHz, CDCl<sub>3</sub>) δ 165.3, 164.9, 148.6, 147.2, 133.83, 133.78, 132.0, 130.3, 129.6, 129.5, 128.8, 128.7, 128.1, 124.3, 123.0, 120.2, 16.5.

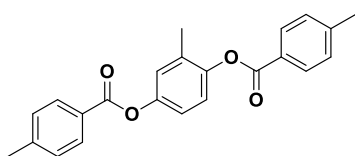

**2-methyl-1,4-phenylene bis(4-methylbenzoate) (3ab).**<sup>2</sup> Yellow solid, 29.1 mg, 81% yield; mp.137.0-138.8 °C; <sup>1</sup>H NMR (400 MHz, CDCl<sub>3</sub>) δ 8.15-8.06 (m, 4H), 7.36-7.29 (m, 4H), 7.21-7.08 (m, 3H), 2.47 (s, 3H), 2.46 (s, 3H), 2.26 (s, 3H); <sup>13</sup>C NMR (100 MHz, CDCl<sub>3</sub>) δ 165.4, 165.0, 148.6, 147.2, 144.7, 144.6, 132.0, 130.37, 130.36, 129.5, 129.4, 126.9, 126.7, 124.2, 123.0, 120.2, 22.0, 16.6.

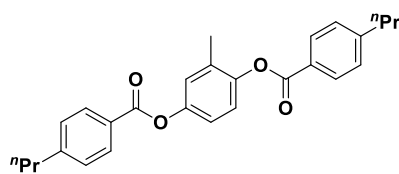

**2-methyl-1,4-phenylene bis(4-propylbenzoate) (3ac).**<sup>2</sup> Yellow solid, 26.6 mg, 64% yield; mp.95.7-97.2 °C; <sup>1</sup>H NMR (400 MHz, CDCl<sub>3</sub>) δ 8.21-8.10 (m, 4H), 7.39-7.31 (m, 4H), 7.19 (d, *J* = 8.6 Hz, 1H), 7.15 (d, *J* = 2.5 Hz, 1H), 7.10 (dd, *J* = 8.6, 2.7 Hz, 1H), 2.72 – 2.67 (m, 4H), 2.26 (s, 3H), 1.70 (ddd, *J* = 15.1, 7.5, 2.3 Hz, 4H), 0.98 (td, *J* = 7.3, 3.0 Hz, 6H); <sup>13</sup>C NMR (100 MHz, CDCl<sub>3</sub>) δ 165.4, 165.0, 149.21, 149.25, 149.3, 148.6, 147.2, 132.0, 130.4, 128.90, 128.85, 127.1, 127.0, 124.2, 123.0, 120.2, 38.3, 24.4, 16.6, 13.9.

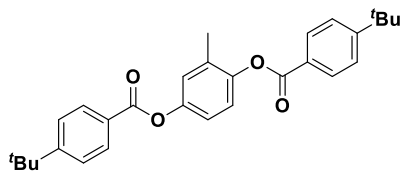

**2-methyl-1,4-phenylene bis(4-(*tert*-butyl)benzoate) (3ad).** Black solid, 30.2 mg, 68% yield; mp.150.7-152.1 °C;  $^1\text{H NMR}$  (400 MHz,  $\text{CDCl}_3$ )  $\delta$  8.20-8.05 (m, 4H), 7.59-7.51 (m, 4H), 7.21-7.09 (m, 3H), 2.26 (s, 3H), 1.39 (s, 9H), 1.38 (s, 9H);  $^{13}\text{C NMR}$  (100 MHz,  $\text{CDCl}_3$ )  $\delta$  165.3, 164.9, 157.63, 157.56, 148.6, 147.2, 132.0, 130.3, 130.2, 126.8, 126.7, 125.8, 125.7, 124.2, 123.0, 120.2, 35.4, 31.2, 16.5; HRMS (ESI)  $m/z$ :  $[\text{M} + \text{H}]^+$  Calcd. for  $\text{C}_{29}\text{H}_{32}\text{O}_4\text{H}^+$  445.2373; found: 445.2379.

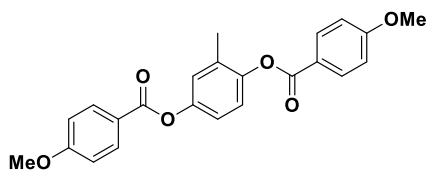

**2-methyl-1,4-phenylene bis(4-methoxybenzoate) (3ae).**<sup>2</sup> White solid, 21.6 mg, 55% yield; mp.166.0-166.8 °C;  $^1\text{H NMR}$  (400 MHz,  $\text{CDCl}_3$ )  $\delta$  8.19 – 8.17 (m, 2H), 8.17 – 8.14 (m, 2H), 7.20-7.06 (m, 3H), 7.01 – 7.00 (m, 2H), 7.00 – 6.98 (m, 2H), 3.91 (s, 3H), 3.90 (s, 3H), 2.25 (s, 3H);  $^{13}\text{C NMR}$  (100 MHz,  $\text{CDCl}_3$ )  $\delta$  165.1, 164.7, 164.11, 164.06, 148.6, 147.2, 132.5, 131.9, 124.3, 123.1, 121.9, 121.8, 120.2, 114.1, 114.0, 55.7, 16.6.

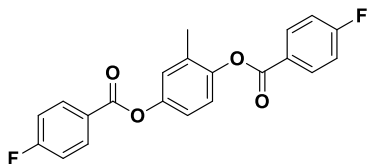

**2-methyl-1,4-phenylene bis(4-fluorobenzoate) (3af).** White solid, 30.5 mg, 83% yield; mp.134.8-135.7 °C;  $^1\text{H NMR}$  (400 MHz,  $\text{CDCl}_3$ )  $\delta$  8.27 – 8.21 (m, 4H), 7.23 – 7.07 (m, 7H), 2.26 (s, 3H).  $^{13}\text{C NMR}$  (100 MHz,  $\text{CDCl}_3$ )  $\delta$  166.39 (d,  $J = 255.3$  Hz, 1C), 166.35 (d,  $J = 255.2$  Hz, 1C), 164.3, 163.9, 148.5, 147.1, 133.0 (d,  $J = 9.4$  Hz, 1C), 132.0, 125.8 (d,  $J = 15.3$  Hz, 1C), 124.3, 123.0, 120.2,

116.04 (d,  $J = 22.1$  Hz, 1C), 115.97 (d,  $J = 22.1$  Hz, 1C), 16.6; HRMS (ESI)  $m/z$ :  $[M + Na]^+$  Calcd. for  $C_{21}H_{14}F_2O_4H^+$  391.0752; found: 391.0717.

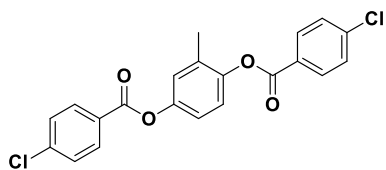

**2-methyl-1,4-phenylene bis(4-chlorobenzoate) (3ag).** White solid, 26.8 mg, 67% yield; mp. 147.2-148.3 °C;  $^1H$  NMR (400 MHz,  $CDCl_3$ )  $\delta$  8.17 – 8.13 (m, 4H), 7.52-7.48 (m, 4H), 7.21-7.10 (m, 3H), 2.25 (s, 3H);  $^{13}C$  NMR (100 MHz,  $CDCl_3$ )  $\delta$  164.4, 164.1, 148.5, 147.1, 140.5, 140.4, 132.0, 131.7, 130.5, 129.2, 129.1, 128.0, 127.8, 124.2, 123.0, 122.9, 120.2, 16.6; HRMS (ESI)  $m/z$ :  $[M + H]^+$  Calcd. for  $C_{21}H_{14}Cl_2O_4H^+$  401.0348; found: 401.0342.

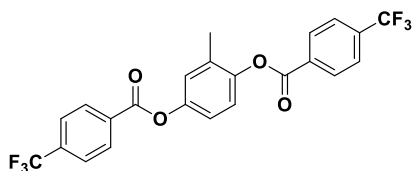

**2-methyl-1,4-phenylene bis(4-(trifluoromethyl)benzoate) (3ah).** Yellow solid, 38.8 mg, 83% yield; mp. 116.2-117.8 °C;  $^1H$  NMR (400 MHz,  $CDCl_3$ )  $\delta$  8.36 – 8.32 (m, 4H), 7.80 (t,  $J = 7.0$  Hz, 4H), 7.24 (d,  $J = 8.7$  Hz, 1H), 7.19 (s, 1H), 7.15 (d,  $J = 8.6$  Hz, 1H), 2.28 (s, 3H).  $^{13}C$  NMR (100 MHz,  $CDCl_3$ )  $\delta$  164.1, 163.7, 148.5, 147.1, 135.4 (q,  $J = 32.6$  Hz), 135.3 (q,  $J = 32.6$  Hz), 132.8, 132.6, 132.0, 130.74, 130.73, 125.8 (d,  $J = 3.5$  Hz), 124.2, 123.7 (q,  $J = 273.4$  Hz), 123.0, 120.2, 16.6; HRMS (ESI)  $m/z$ :  $[M + H]^+$  Calcd. for  $C_{23}H_{14}F_6O_4H^+$  469.0869; found: 469.0854.

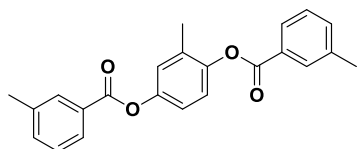

**2-methyl-1,4-phenylene bis(3-methylbenzoate) (3ai).** Black solid, 24.1 mg, 67% yield; mp. 122.5-123.3 °C;  $^1H$  NMR (400 MHz,  $CDCl_3$ )  $\delta$  8.05 – 8.00 (m, 4H), 7.48 – 7.39 (m, 4H), 7.22-7.10 (m, 3H), 2.47 (s, 3H), 2.46 (s, 3H), 2.27 (s, 3H).  $^{13}C$  NMR (100 MHz,  $CDCl_3$ )  $\delta$  165.5, 165.1, 148.6,

147.2, 138.64, 138.56, 134.6, 134.5, 131.9, 130.8, 129.5, 129.4, 128.7, 128.6, 127.5, 124.2, 123.0, 120.2, 21.4, 16.5; HRMS (ESI)  $m/z$ :  $[M + H]^+$  Calcd. for  $C_{23}H_{20}O_4H^+$  361.1434; found: 361.1438.

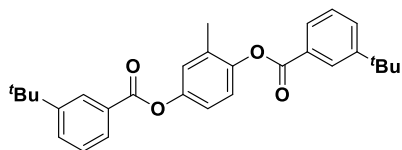

**2-methyl-1,4-phenylene bis(3-(*tert*-butyl)benzoate) (3aj).** Black oil, 39.9 mg, 90% yield;  $^1H$  NMR (400 MHz,  $CDCl_3$ )  $\delta$  8.27 (t,  $J = 1.7$  Hz, 1H), 8.24 (t,  $J = 1.7$  Hz, 1H), 8.08 – 8.03 (m, 2H), 7.72 – 7.68 (m, 2H), 7.49 – 7.47 (m, 1H), 7.46 – 7.44 (m, 1H), 7.22 (d,  $J = 8.6$  Hz, 1H), 7.18 (d,  $J = 2.6$  Hz, 1H), 7.13 (dd,  $J = 8.6, 2.7$  Hz, 1H), 2.29 (s, 3H), 1.40 (s, 9H), 1.40 (s, 9H);  $^{13}C$  NMR (100 MHz,  $CDCl_3$ )  $\delta$  165.7, 165.3, 151.98, 151.90, 148.6, 147.3, 132.0, 130.99, 130.91, 129.4, 129.2, 128.6, 128.5, 127.5, 127.23, 127.21, 124.3, 123.0, 120.2, 35.0, 31.4, 16.6; HRMS (ESI)  $m/z$ :  $[M + H]^+$  Calcd. for  $C_{29}H_{32}O_4H^+$  445.2373; found: 445.2383.

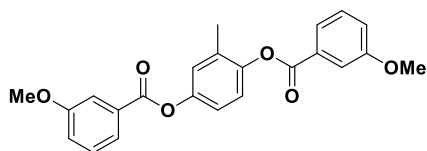

**2-methyl-1,4-phenylene bis(3-methoxybenzoate) (3ak).** Yellow solid, 24.7 mg, 63% yield; mp. 105.7-107.0 °C;  $^1H$  NMR (400 MHz,  $CDCl_3$ )  $\delta$  7.85 – 7.80 (m, 2H), 7.75-7.70 (m, 2H), 7.49-7.41 (m, 2H), 7.21 – 7.10 (m, 5H), 3.90 (s, 6H), 2.27 (s, 3H);  $^{13}C$  NMR (100 MHz,  $CDCl_3$ )  $\delta$  165.2, 164.8, 159.90, 159.86, 148.6, 147.2, 132.0, 131.0, 130.7, 129.83, 129.77, 124.3, 123.0, 122.8, 120.4, 120.2, 114.7, 114.6, 55.7, 16.5; HRMS (ESI)  $m/z$ :  $[M + H]^+$  Calcd. for  $C_{23}H_{20}O_6H^+$  393.1333; found: 393.1357.

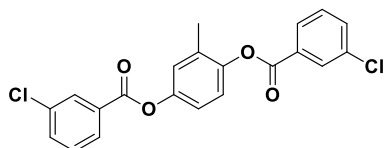

**2-methyl-1,4-phenylene bis(3-chlorobenzoate) (3al).** Yellow solid, 31.9 mg, 80% yield; mp.142.4-144.1 °C; <sup>1</sup>H NMR (400 MHz, CDCl<sub>3</sub>) δ 8.19 (d, *J* = 9.0 Hz, 2H), 8.10 (t, *J* = 8.6 Hz, 2H), 7.63 (s, 2H), 7.48 – 7.47 (m, 2H), 7.20 (d, *J* = 8.5 Hz, 1H), 7.16 (s, 1H), 7.12 (d, *J* = 8.2 Hz, 1H), 2.26 (s, 3H); <sup>13</sup>C NMR (100 MHz, CDCl<sub>3</sub>) δ 164.1, 163.7, 148.5, 147.1, 135.0, 134.9, 133.9, 133.8, 132.0, 131.3, 131.1, 130.3, 130.2, 130.14, 130.07, 128.4, 124.2, 123.0, 120.2, 16.6; HRMS (ESI) *m/z*: [M + H]<sup>+</sup> Calcd. for C<sub>21</sub>H<sub>14</sub>Cl<sub>2</sub>O<sub>4</sub>H<sup>+</sup> 401.0342; found: 401.0347.

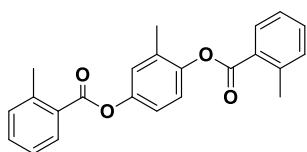

**2-methyl-1,4-phenylene bis(2-methylbenzoate) (3am).** Yellow solid, 29.8 mg, 83% yield; mp.93.1-94.2 °C; <sup>1</sup>H NMR (400 MHz, CDCl<sub>3</sub>) δ 8.10 – 8.05 (m, 4H), 7.53 – 7.44 (m, 4H), 7.25-7.11 (m, 3H), 2.52 (s, 3H), 2.51 (s, 3H), 2.32 (s, 3H); <sup>13</sup>C NMR (100 MHz, CDCl<sub>3</sub>) δ 166.0, 165.6, 148.5, 147.2, 141.6, 141.5, 133.0, 132.9, 132.2, 132.1, 132.0, 131.33, 131.30, 128.6, 128.5, 126.12, 126.08, 124.4, 123.1, 120.3, 22.1, 16.7; HRMS (ESI) *m/z*: [M + H]<sup>+</sup> Calcd. for C<sub>23</sub>H<sub>20</sub>O<sub>4</sub>H<sup>+</sup> 361.1434; found: 361.1436.

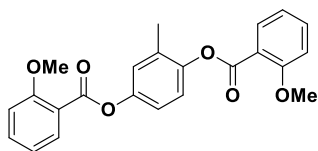

**2-methyl-1,4-phenylene bis(2-methoxybenzoate) (3an).** Black solid, 27.8 mg, 71% yield; mp.95.6-96.7 °C; <sup>1</sup>H NMR (400 MHz, CDCl<sub>3</sub>) δ 8.03 (td, *J* = 8.0, 1.8 Hz, 2H), 7.58 – 7.53 (m, 2H), 7.21-7.15 (m, 2H), 7.12 – 7.08 (m, 1H), 7.08 – 7.03 (m, 4H), 3.95 (s, 3H), 3.95 (s, 3H), 2.29 (s, 3H); <sup>13</sup>C NMR (100 MHz, CDCl<sub>3</sub>) δ 164.5, 164.4, 160.0, 156.0, 148.5, 147.1, 134.4, 132.34, 132.30, 131.8, 124.3, 123.1, 120.40, 120.36, 120.2, 119.2, 112.36, 112.35, 56.2, 56.1, 16.7; HRMS (ESI) *m/z*: [M + H]<sup>+</sup> Calcd. for C<sub>23</sub>H<sub>20</sub>O<sub>6</sub>H<sup>+</sup> 393.1333; found: 445.1343.

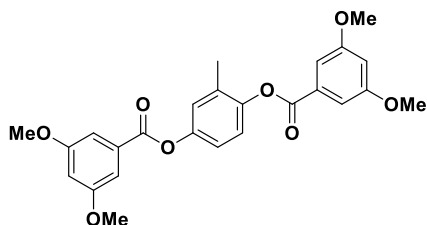

**2-methyl-1,4-phenylene bis(3,5-dimethoxybenzoate) (3ao).** White solid, 37.1 mg, 82% yield; mp.138.0-139.8 °C;  $^1\text{H}$  NMR (400 MHz,  $\text{CDCl}_3$ )  $\delta$  7.37 (d,  $J = 2.3$  Hz, 2H), 7.34 (d,  $J = 2.3$  Hz, 2H), 7.20 (d,  $J = 8.6$  Hz, 1H), 7.15 (d,  $J = 2.5$  Hz, 1H), 7.10 (dd,  $J = 8.6, 2.6$  Hz, 1H), 6.73 (dt,  $J = 4.8, 2.3$  Hz, 2H), 3.87 (s, 6H), 3.87 (s, 6H), 2.26 (s, 3H);  $^{13}\text{C}$  NMR (100 MHz,  $\text{CDCl}_3$ )  $\delta$  165.1, 164.7, 160.97, 160.92, 148.6, 147.2, 132.0, 131.4, 131.2, 124.2, 123.0, 120.2, 107.9, 107.8, 106.6, 106.5, 55.8, 16.5; HRMS (ESI)  $m/z$ :  $[\text{M} + \text{H}]^+$  Calcd. for  $\text{C}_{25}\text{H}_{24}\text{O}_8\text{H}^+$  453.1544; found: 453.1554.

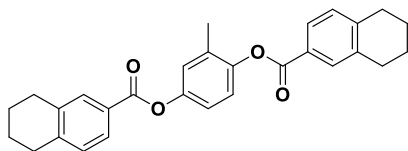

**2-methyl-1,4-phenylene bis(5,6,7,8-tetrahydronaphthalene-2-carboxylate) (3ap).** Yellow solid, 35.7 mg, 81% yield; mp.127.7-129.1 °C;  $^1\text{H}$  NMR (400 MHz,  $\text{CDCl}_3$ )  $\delta$  7.94 – 7.89 (m, 4H), 7.21-7.08 (m, 5H), 2.86 (s, 8H), 2.25 (s, 3H), 1.85 (s, 8H);  $^{13}\text{C}$  NMR (100MHz,  $\text{CDCl}_3$ )  $\delta$  165.6, 165.2, 148.6, 147.2, 143.6, 143.9, 137.8, 137.7, 132.0, 131.2, 129.6, 129.5, 127.3, 126.7, 126.6, 124.3, 123.0, 120.2, 29.9, 29.5; HRMS (ESI)  $m/z$ :  $[\text{M} + \text{H}]^+$  Calcd. for  $\text{C}_{29}\text{H}_{28}\text{O}_4\text{H}^+$  441.2060; found: 441.2065.

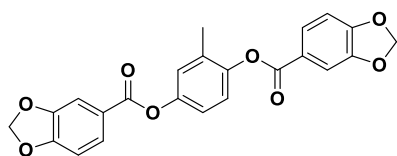

**2-methyl-1,4-phenylene bis(benzo[d][1,3]dioxole-5-carboxylate) (3aq).** Yellow solid, 35.7 mg, 85% yield; mp.149.6-151.7 °C;  $^1\text{H}$  NMR (400 MHz,  $\text{CDCl}_3$ )  $\delta$  7.83 (t,  $J = 9.2$  Hz, 2H), 7.62 (d,  $J = 9.5$  Hz, 2H), 7.20-7.05 (m, 3H), 6.93 – 6.90(m, 2H), 6.09 (s, 4H), 2.24 (s, 3H);  $^{13}\text{C}$  NMR (100 MHz,  $\text{CDCl}_3$ )  $\delta$  164.6, 164.3, 152.42, 152.37, 148.5, 148.10, 148.06, 147.1, 131.9, 126.4, 124.2, 123.5,



123.3, 123.0, 120.1, 110.1, 108.4, 108.3, 102.14, 102.13, 16.5; HRMS (ESI)  $m/z$ :  $[M + H]^+$  Calcd. for  $C_{23}H_{16}O_8H^+$  421.0918; found: 421.0945.

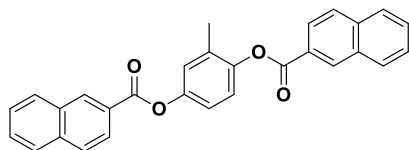

**2-methyl-1,4-phenylene bis(2-naphthoate) (3ar).** White solid, 32.8 mg, 76% yield; mp.180.8-181.7 °C;  $^1H$  NMR (400 MHz,  $CDCl_3$ )  $\delta$  9.08 (t,  $J = 8.3$  Hz, 2H), 8.59-8.46 (m, 2H), 8.16-8.10 (m, 2H), 7.97-7.90 (m, 2H), 7.71-7.56 (m, 6H), 7.35-7.21 (m, 3H), 2.41 (s, 3H);  $^{13}C$  NMR (100 MHz,  $CDCl_3$ )  $\delta$  165.5, 165.1, 148.7, 147.3, 136.03, 136.0, 132.67, 132.66, 132.13, 132.07, 129.7, 128.9, 128.8, 128.64, 128.58, 128.0, 127.1, 127.0, 126.8, 126.6, 125.6, 124.3, 123.1, 120.3, 16.8; HRMS (ESI)  $m/z$ :  $[M + H]^+$  Calcd. for  $C_{29}H_{20}O_4H^+$  433.1434; found: 433.1445.

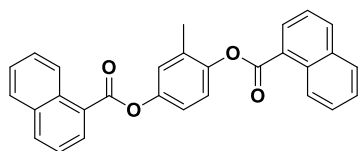

**2-methyl-1,4-phenylene bis(1-naphthoate) (3as).** White solid, 32.8 mg, 76% yield; mp.140.1-141.6 °C;  $^1H$  NMR (400 MHz,  $CDCl_3$ )  $\delta$  9.07 (t,  $J = 8.3$  Hz, 2H), 8.57-8.46 (m, 2H), 8.16-8.09 (m, 2H), 7.97-7.92 (m, 2H), 7.71-7.56 (m, 6H), 7.33-7.21 (m, 3H), 7.2.37 (s, 3H);  $^{13}C$  NMR (100 MHz,  $CDCl_3$ )  $\delta$  164.1, 163.7, 148.5, 147.1, 132.8, 132.6, 132.0, 130.8, 130.7, 125.91, 125.87, 125.84, 125.80, 125.0, 124.3, 123.0, 122.33, 122.27, 120.2, 16.6; HRMS (ESI)  $m/z$ :  $[M + H]^+$  Calcd. for  $C_{29}H_{20}O_4H^+$  433.1434; found: 433.1433.

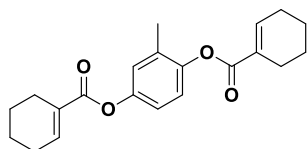

**1,1,4-trimethyl-5-phenyl-7-(*o*-tolyl)-1,3-dihydroisobenzofuran (3at).** Black oil, 15.5 mg, 57% yield;  $^1H$  NMR (400 MHz,  $CDCl_3$ )  $\delta$  7.25 – 7.23 (m, 1H), 7.23 – 7.21 (m, 1H), 7.03 (d,  $J = 8.6$  Hz, 1H), 6.98 (d,  $J = 2.6$  Hz, 1H), 6.94 (dd,  $J = 8.6, 2.7$  Hz, 1H), 2.39 – 2.36 (m, 4H), 2.29 – 2.27 (m,

4H), 2.17 (s, 3H), 1.73 – 1.70 (m, 4H), 1.69 – 1.65 (m, 4H);  $^{13}\text{C}$  NMR (100 MHz,  $\text{CDCl}_3$ )  $\delta$  166.1, 165.8, 148.4, 147.0, 142.09, 142.08, 131.7, 130.0, 129.9, 124.1, 122.9, 120.0, 26.2, 24.39, 24.35, 22.2, 21.5, 16.5; HRMS (ESI)  $m/z$ :  $[\text{M} + \text{H}]^+$  Calcd. for  $\text{C}_{21}\text{H}_{24}\text{O}_4\text{H}^+$  341.1747; found: 341.1750.

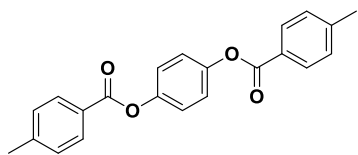

**1,4-phenylene bis(4-methylbenzoate) (3bb).**<sup>3</sup> Black oil, 20.4 mg, 59% yield;  $^1\text{H}$  NMR (400 MHz,  $\text{CDCl}_3$ )  $\delta$  8.11 (s, 2H), 8.09 (s, 2H), 7.33 (s, 2H), 7.31 (s, 2H), 7.27 (s, 4H), 2.46 (s, 6H);  $^{13}\text{C}$  NMR (100 MHz,  $\text{CDCl}_3$ )  $\delta$  165.3, 148.6, 144.7, 130.4, 129.5, 126.8, 122.8, 21.9.

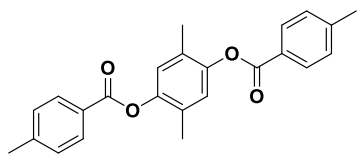

**2,5-dimethyl-1,4-phenylene bis(4-methylbenzoate) (3cb).** Yellow solid, 29.9 mg, 80% yield; mp.189.1-189.5 °C;  $^1\text{H}$  NMR (400 MHz,  $\text{CDCl}_3$ )  $\delta$  8.11 (d,  $J = 8.2$  Hz, 4H), 7.32 (d,  $J = 8.0$  Hz, 4H), 7.06 (s, 2H), 2.46 (s, 6H), 2.20 (s, 6H);  $^{13}\text{C}$  NMR (100 MHz,  $\text{CDCl}_3$ )  $\delta$  165.1, 147.1, 144.6, 130.4, 129.5, 129.1, 126.8, 124.4, 21.9, 16.2; HRMS (ESI)  $m/z$ :  $[\text{M} + \text{H}]^+$  Calcd. for  $\text{C}_{24}\text{H}_{22}\text{O}_4\text{H}^+$  375.1591; found: 375.1595.

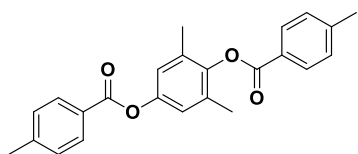

**2,6-dimethyl-1,4-phenylene bis(4-methylbenzoate) (3db).** Yellow solid, 26.1 mg, 70% yield; mp.148.7-149.5 °C;  $^1\text{H}$  NMR (400 MHz,  $\text{CDCl}_3$ )  $\delta$  8.14 (d,  $J = 8.2$  Hz, 2H), 8.09 (d,  $J = 8.2$  Hz, 2H), 7.34 (d,  $J = 8.0$  Hz, 2H), 7.31 (d,  $J = 8.0$  Hz, 2H), 6.97 (s, 2H), 2.47 (s, 3H), 2.46 (s, 3H), 2.21 (s, 6H);  $^{13}\text{C}$  NMR (100 MHz,  $\text{CDCl}_3$ )  $\delta$  165.5, 164.5, 148.3, 146.0, 144.7, 144.5, 132.0, 130.4, 130.3,

129.5, 129.4, 127.0, 126.5, 121.6, 22.0, 16.8; HRMS (ESI)  $m/z$ :  $[M + H]^+$  Calcd. for  $C_{24}H_{22}O_4H^+$  375.1591; found: 375.1595.

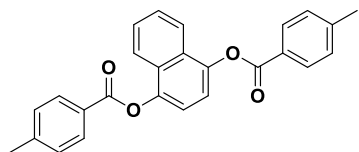

**naphthalene-1,4-diyl bis(4-methylbenzoate) (3eb).** Black solid, 20.9 mg, 53% yield; mp.166.6-167.3 °C;  $^1H$  NMR (400 MHz,  $CDCl_3$ )  $\delta$  8.26 (s, 2H), 8.24 (s, 2H), 7.98 (dd,  $J = 6.5, 3.2$  Hz, 2H), 7.54 (dd,  $J = 6.5, 3.2$  Hz, 2H), 7.44 (s, 2H), 7.40 (s, 2H), 7.38 (s, 2H), 2.50 (s, 6H);  $^{13}C$  NMR (100 MHz,  $CDCl_3$ )  $\delta$  165.1, 144.7, 144.6, 130.4, 129.5, 127.9, 126.9, 126.5, 121.8, 118.0, 21.8; HRMS (ESI)  $m/z$ :  $[M + H]^+$  Calcd. for  $C_{26}H_{20}O_4H^+$  397.1434; found: 397.1440.

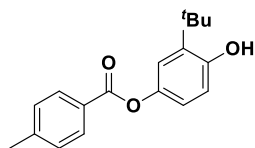

**3-(*tert*-butyl)-4-hydroxyphenyl 4-methylbenzoate (3fb).**<sup>4</sup> Black solid, 9.1 mg, 40% yield; mp.162.5-163.7 °C;  $^1H$  NMR (400 MHz,  $CDCl_3$ )  $\delta$  8.09 (d,  $J = 8.2$  Hz, 2H), 7.31 (d,  $J = 8.0$  Hz, 2H), 7.06 (d,  $J = 2.8$  Hz, 1H), 6.89 (dd,  $J = 8.5, 2.8$  Hz, 1H), 6.65 (d,  $J = 8.5$  Hz, 1H), 5.17 (s, 1H), 2.45 (s, 3H), 1.40 (s, 9H);  $^{13}C$  NMR (100 MHz,  $CDCl_3$ )  $\delta$  166.2, 152.2, 144.5, 144.2, 137.6, 130.3, 129.4, 127.1, 120.4, 119.8, 117.1, 34.9, 29.52, 29.48, 22.0.

#### 4. References

- (1) Couladouros, E. A.; Moutsos, V. I.; Lampropoulou, M.; Little, J. L.; Hyatt, J. A. A short and convenient chemical route to optically pure 2-methyl chromanmethanols. Total asymmetric synthesis of  $\beta$ -,  $\gamma$ -, and  $\delta$ -tocotrienols. *J. Org. Chem.* **2007**, *72*, 6735-6741.
- (2) Matsuyama, H.; Katoh, S.; Yoshikawa, M. Polymerizable liquid crystal compound, liquid crystal composition, polymer material and method for manufacturing the same, and film. US 20150344782A1.
- (3) Hembre, R. T. Process for the preparation of arylcarboxylate esters. EP 1083167A1.
- (4) Song, K.; Xu, X.; Liu, P.; Chen, L.; Shen, X.; Liu, J.; Hu, L. Discovery and SAR study of 3-(tert-butyl)-4-hydroxyphenyl benzoate and benzamide derivatives as novel farnesoid X receptor (FXR) antagonists. *Bioorg. Med. Chem.* **2015**, *23*, 6427-6436.

## 5. <sup>1</sup>H, <sup>13</sup>C spectra of products (3aa–at,3bb–fb)

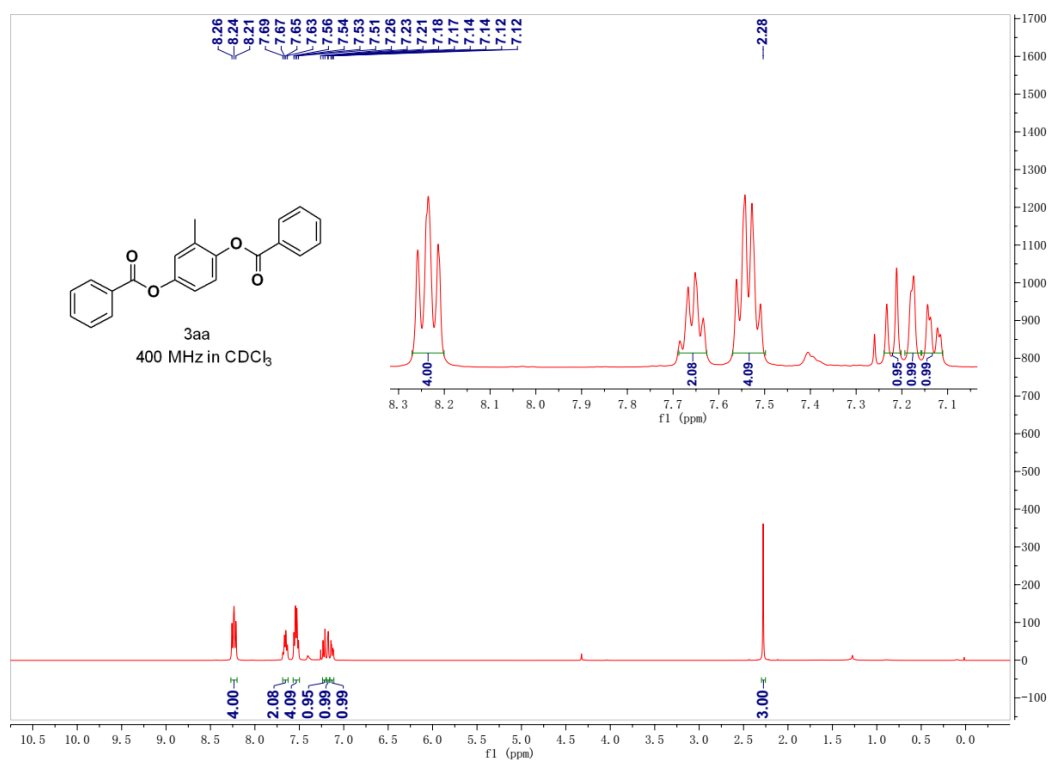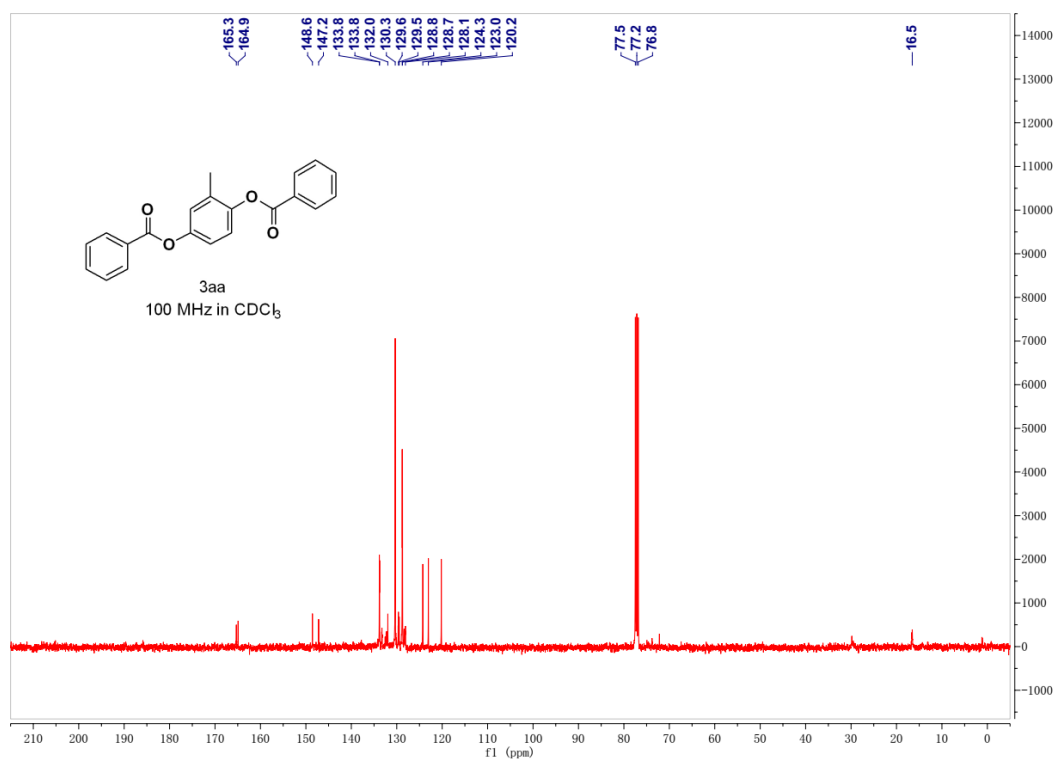

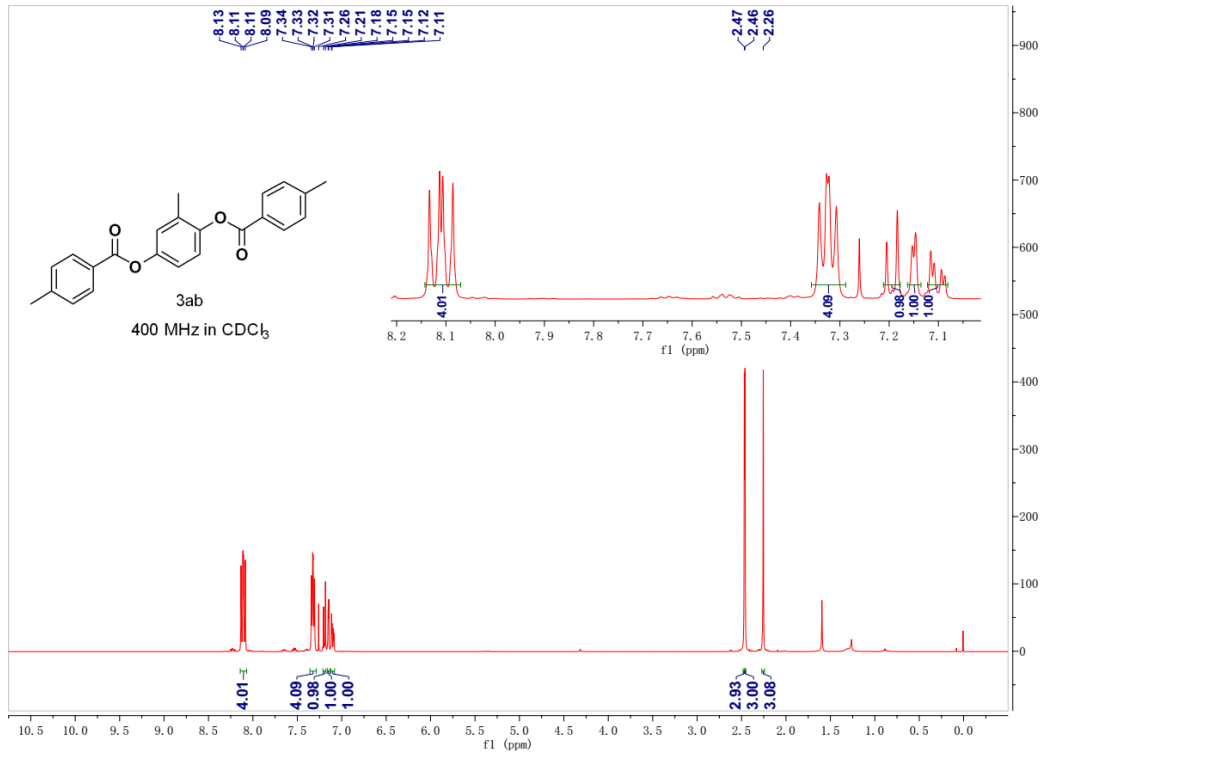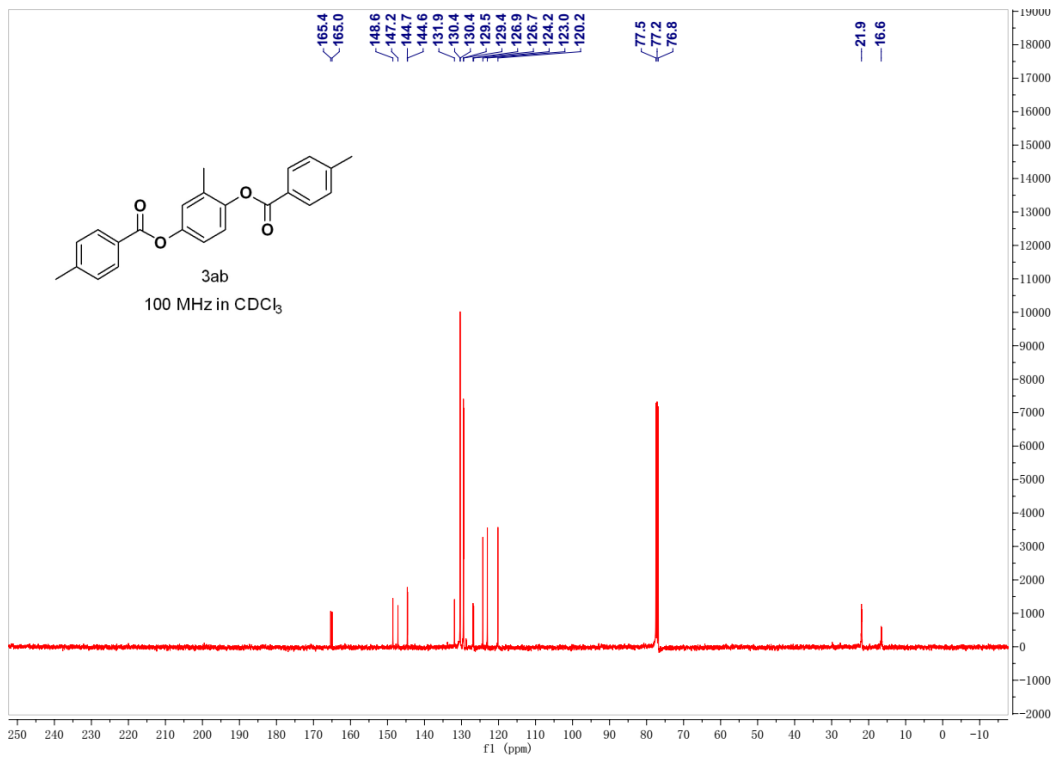

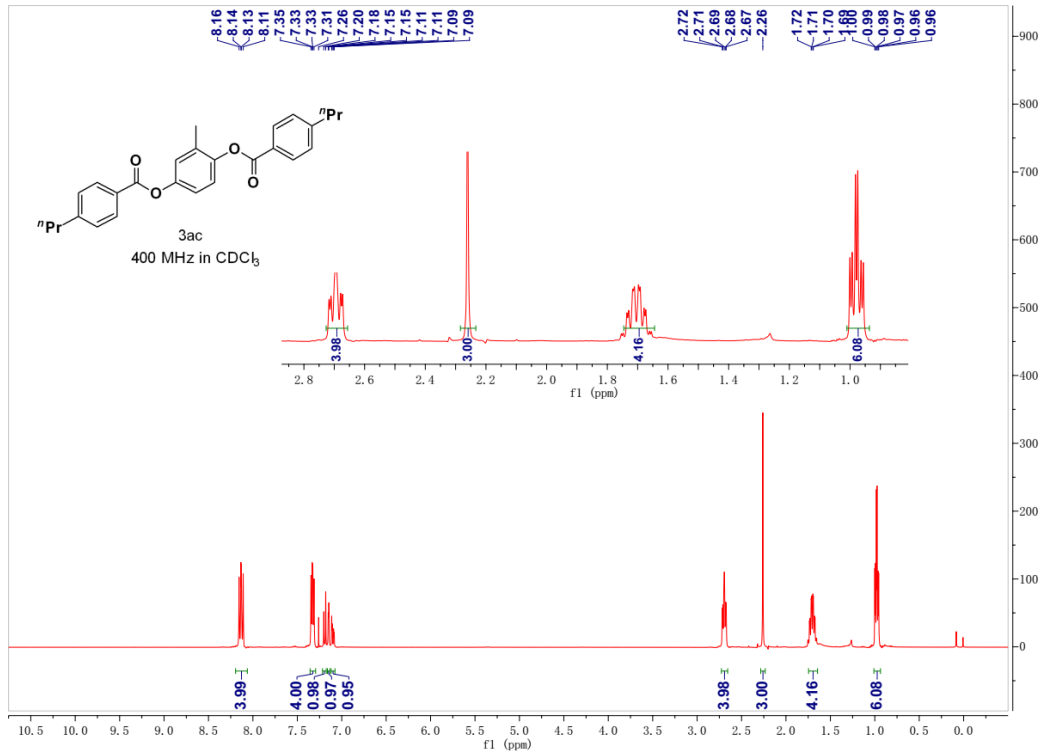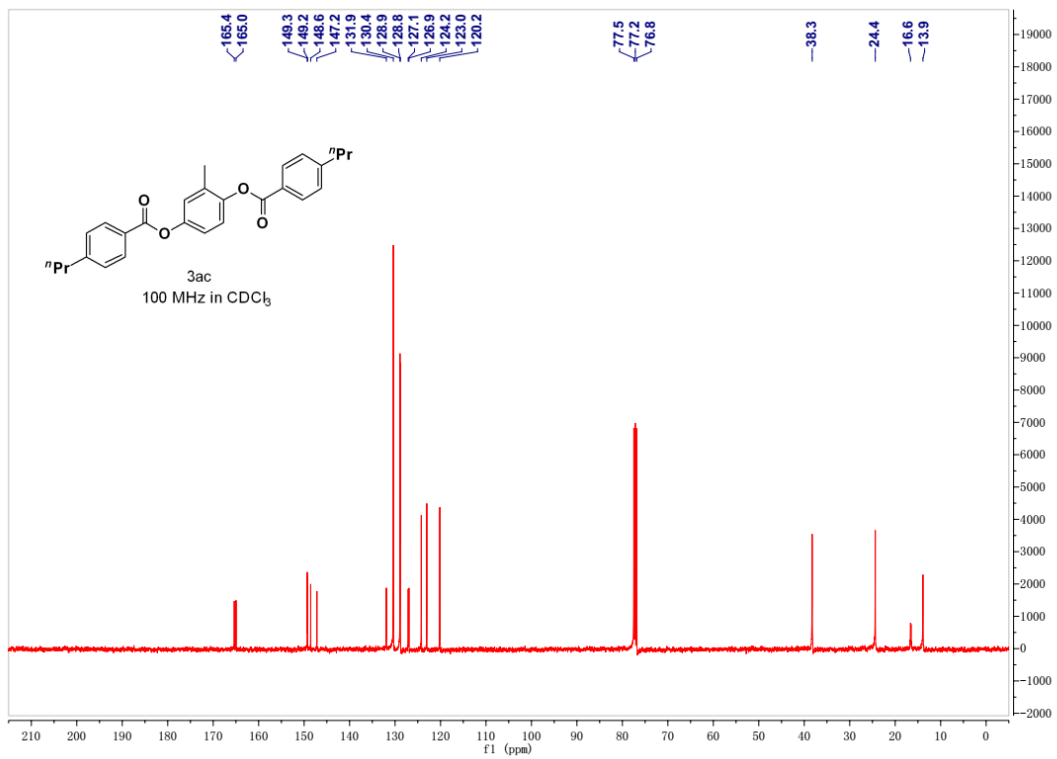

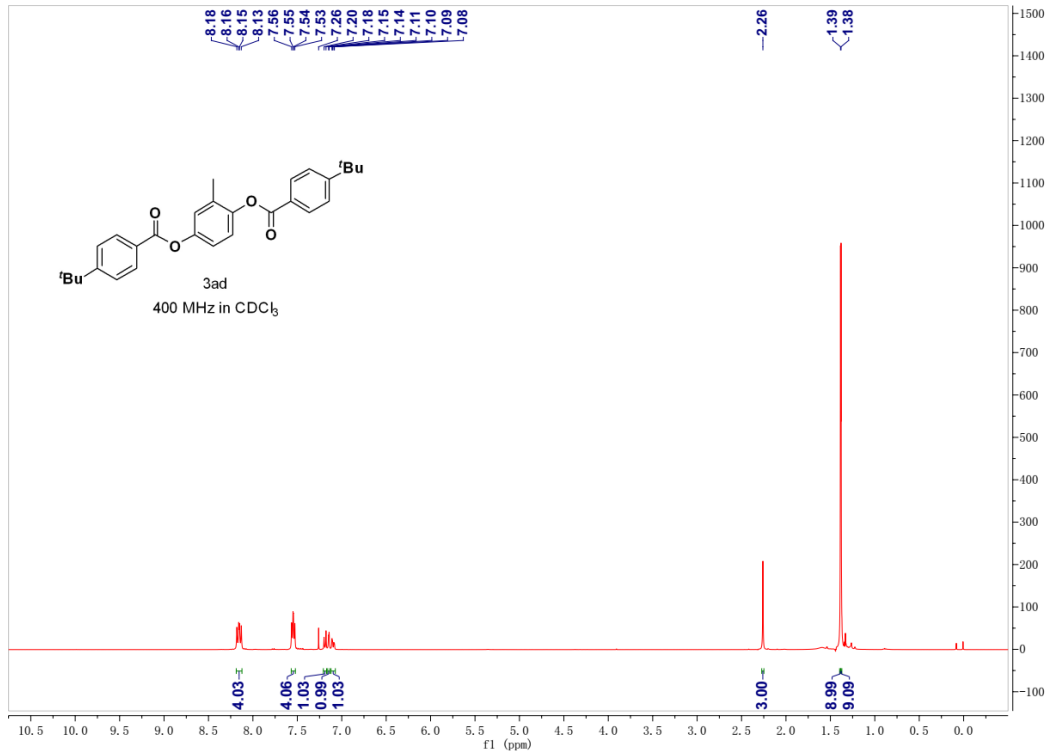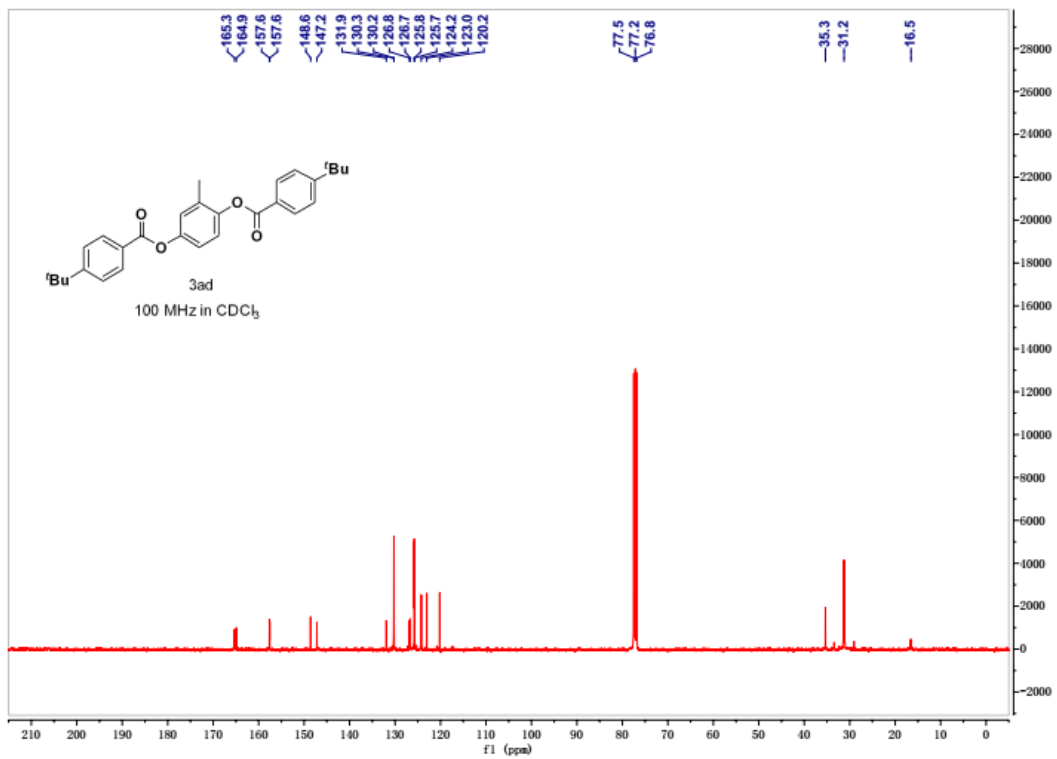



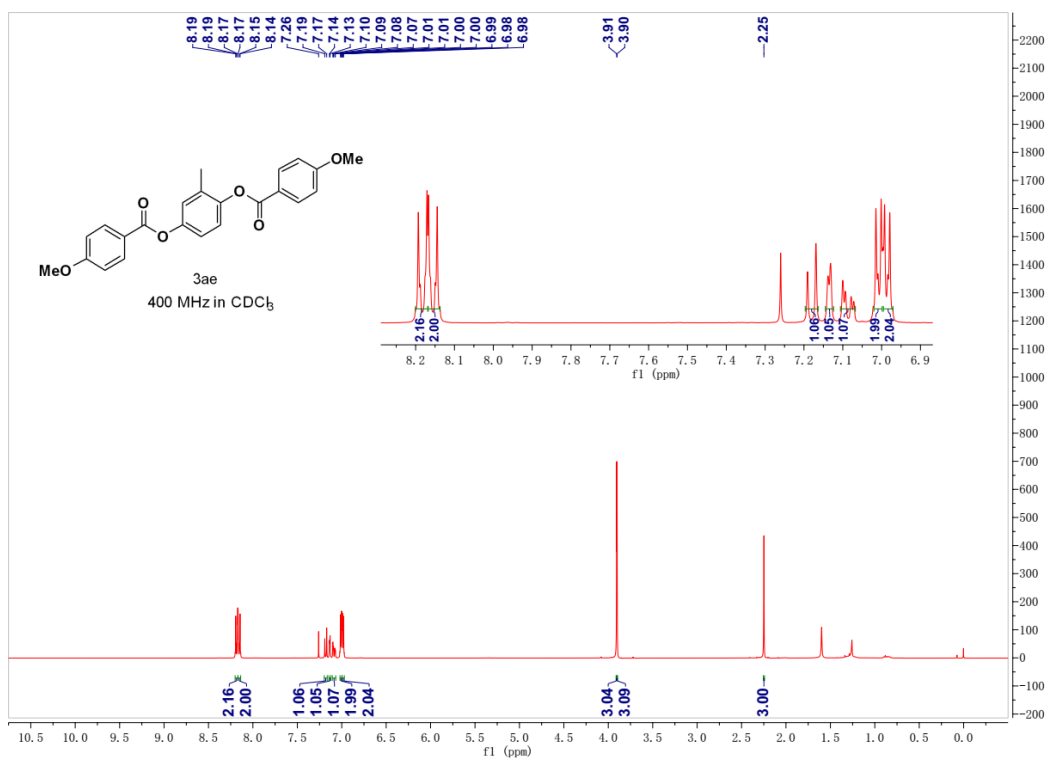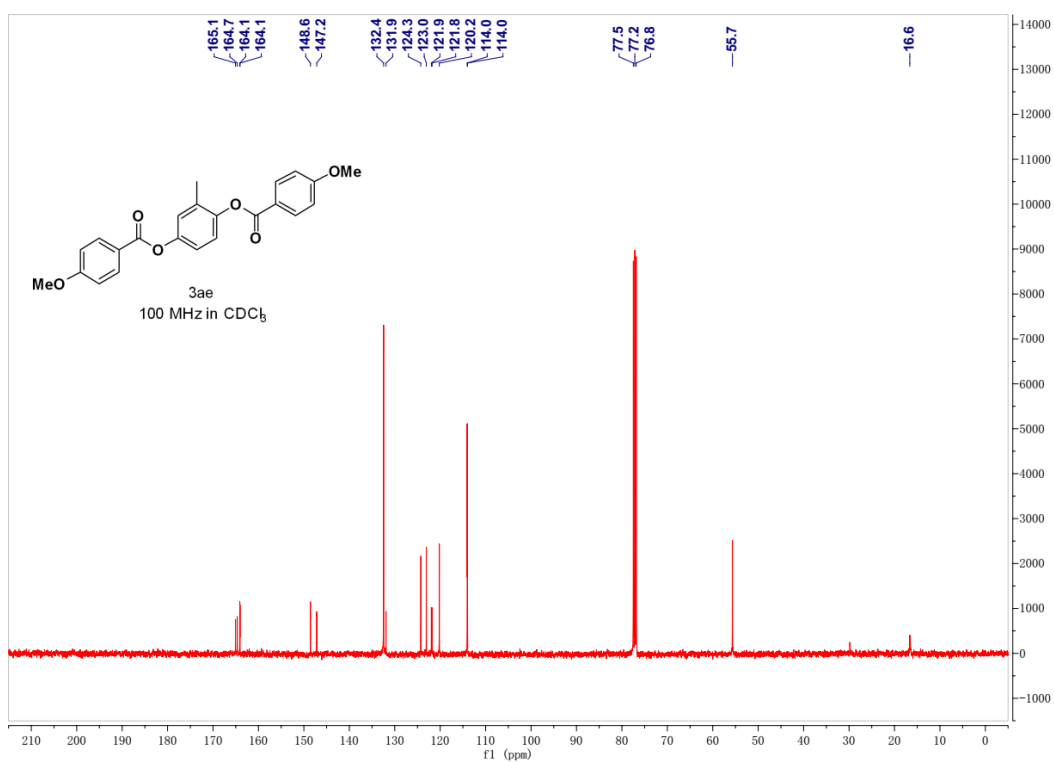

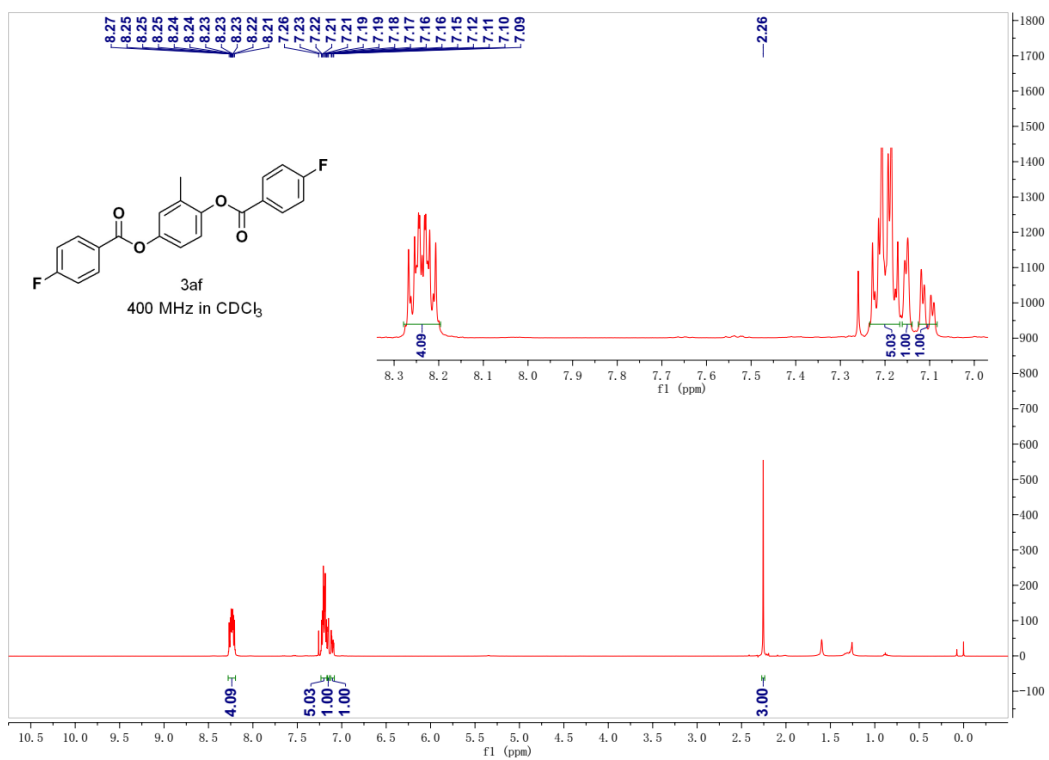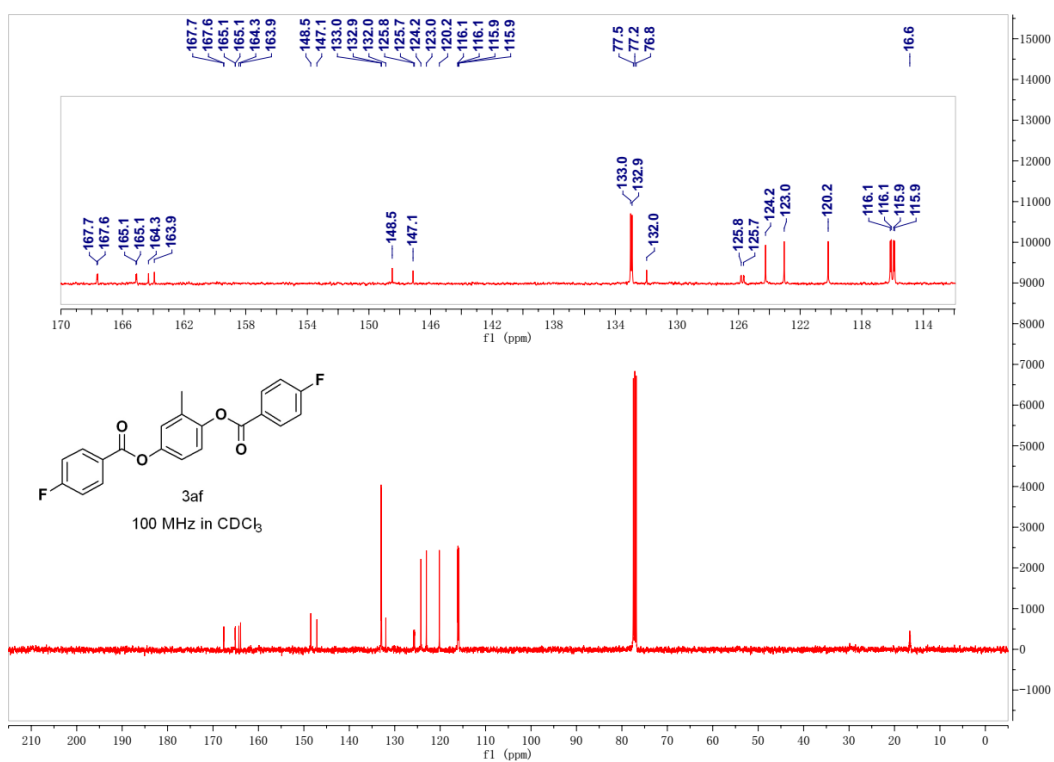

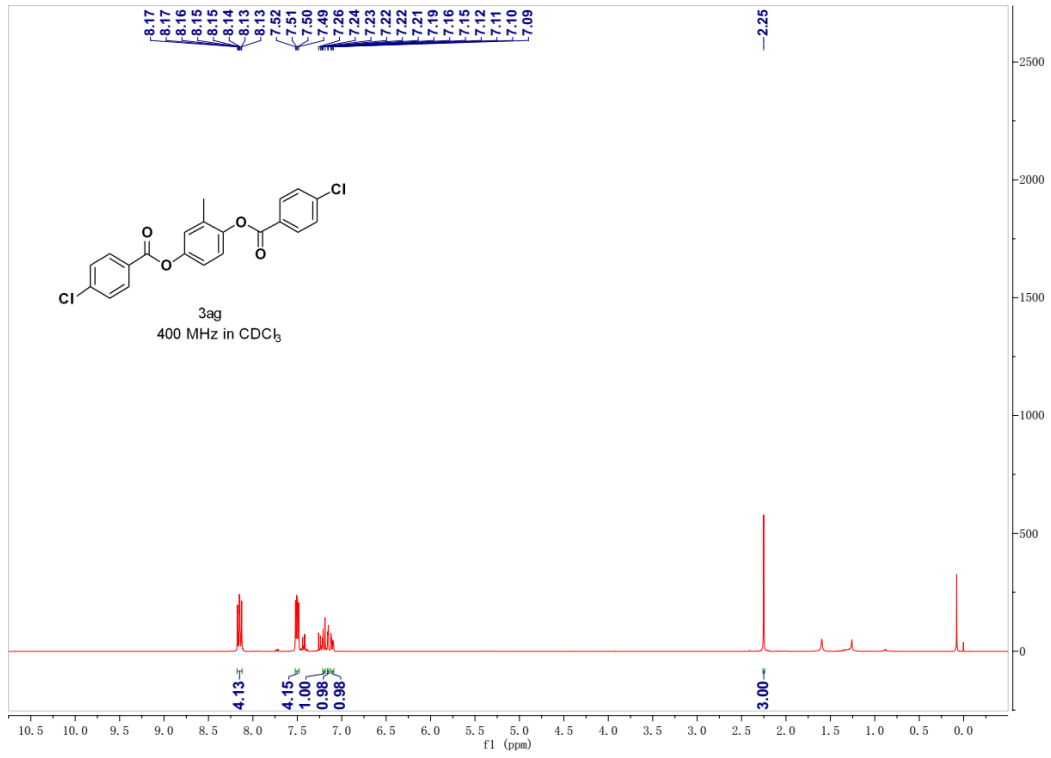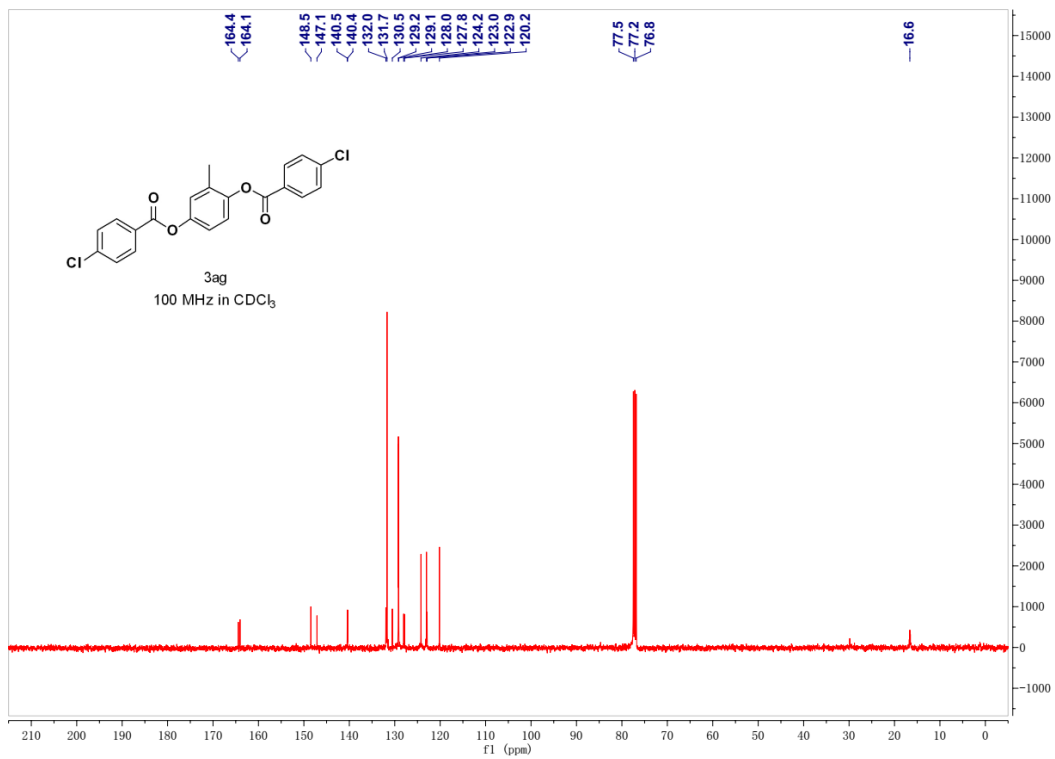

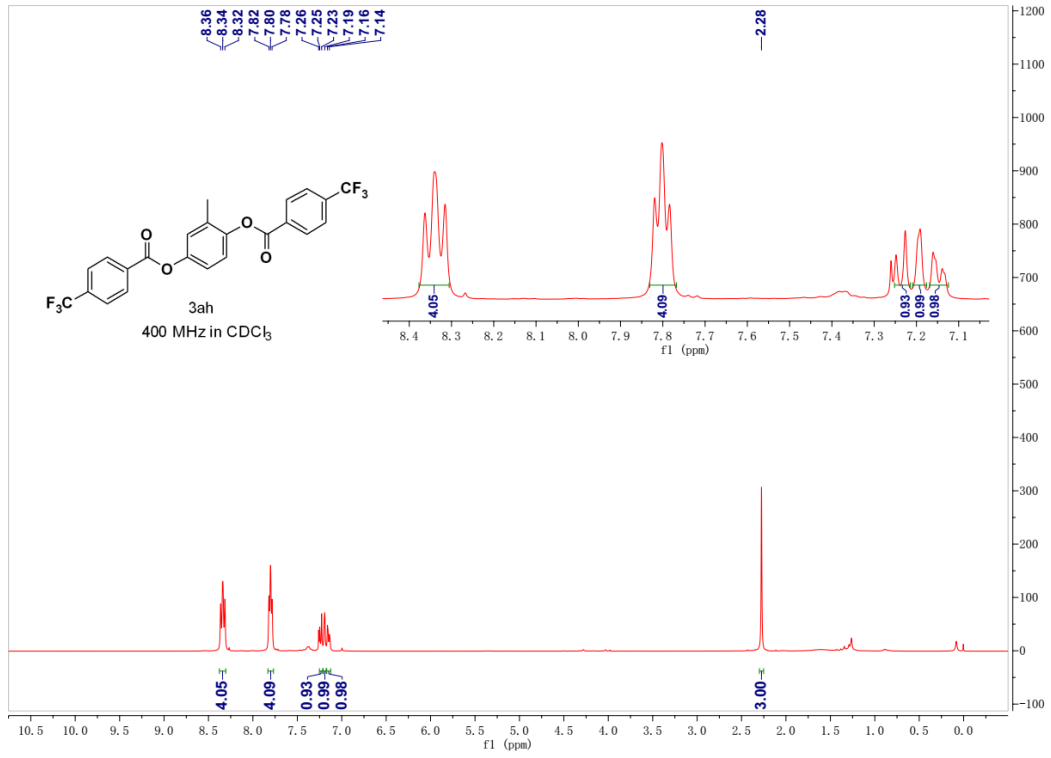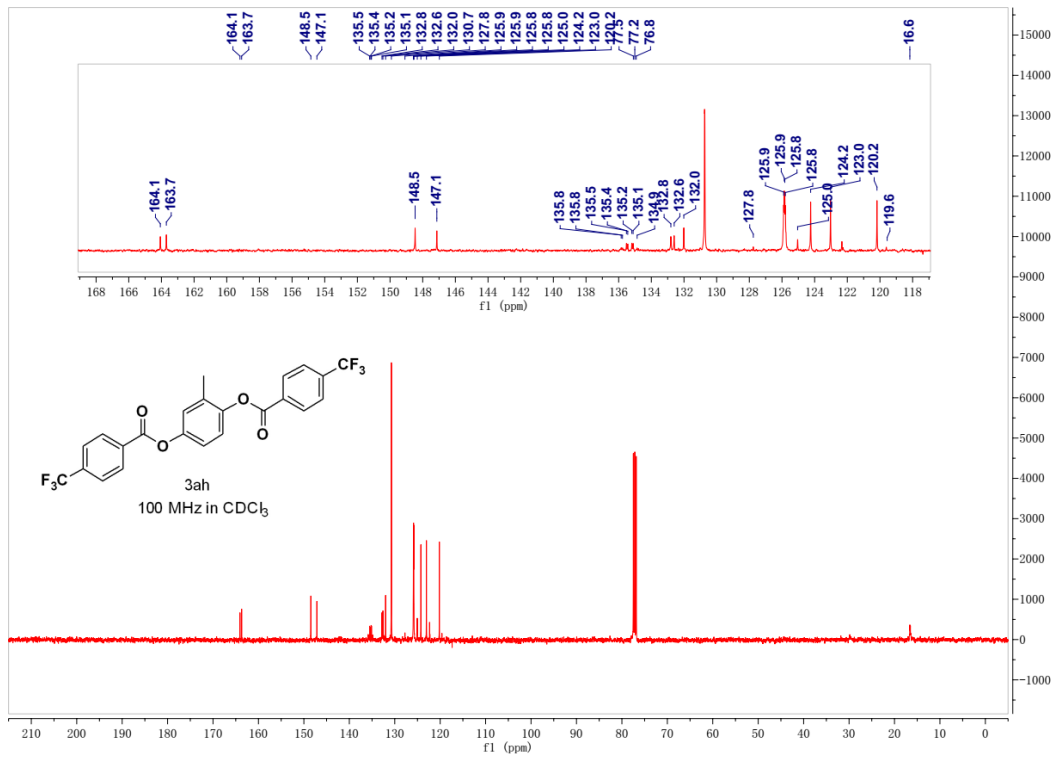

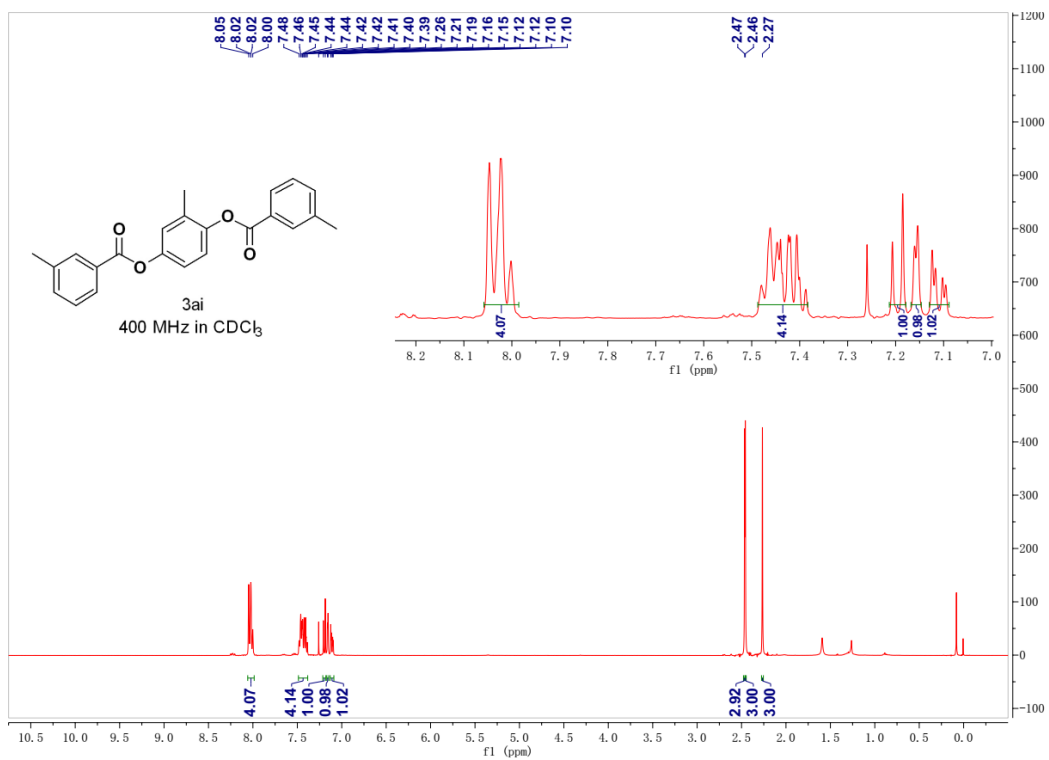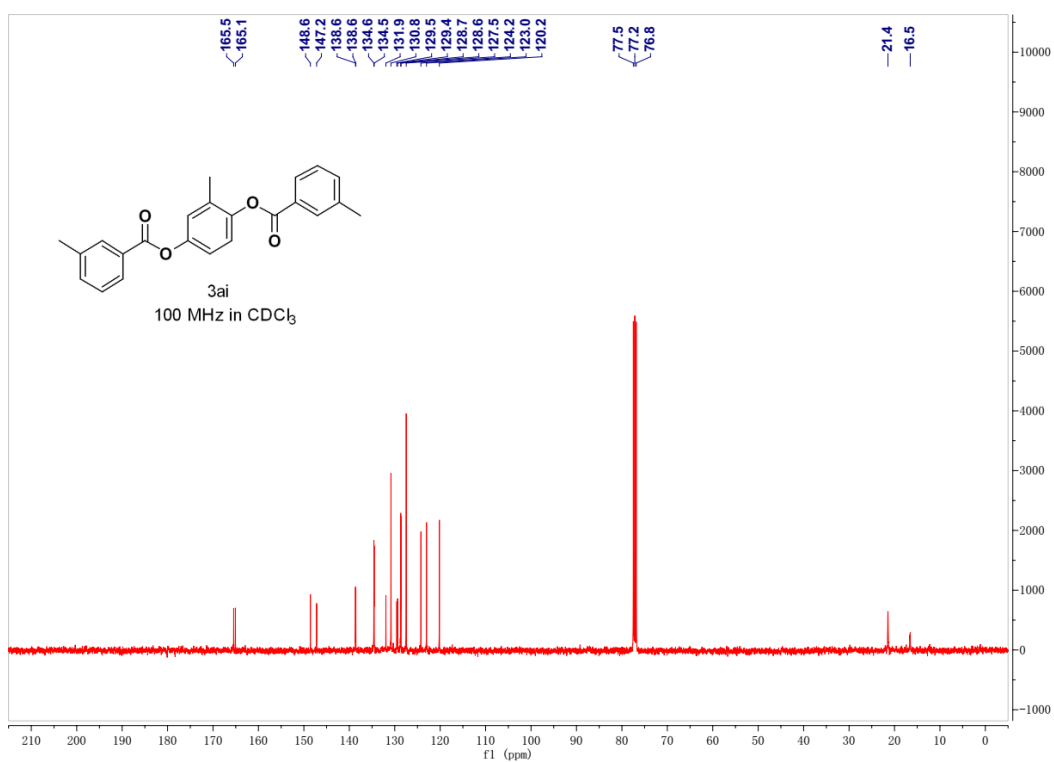

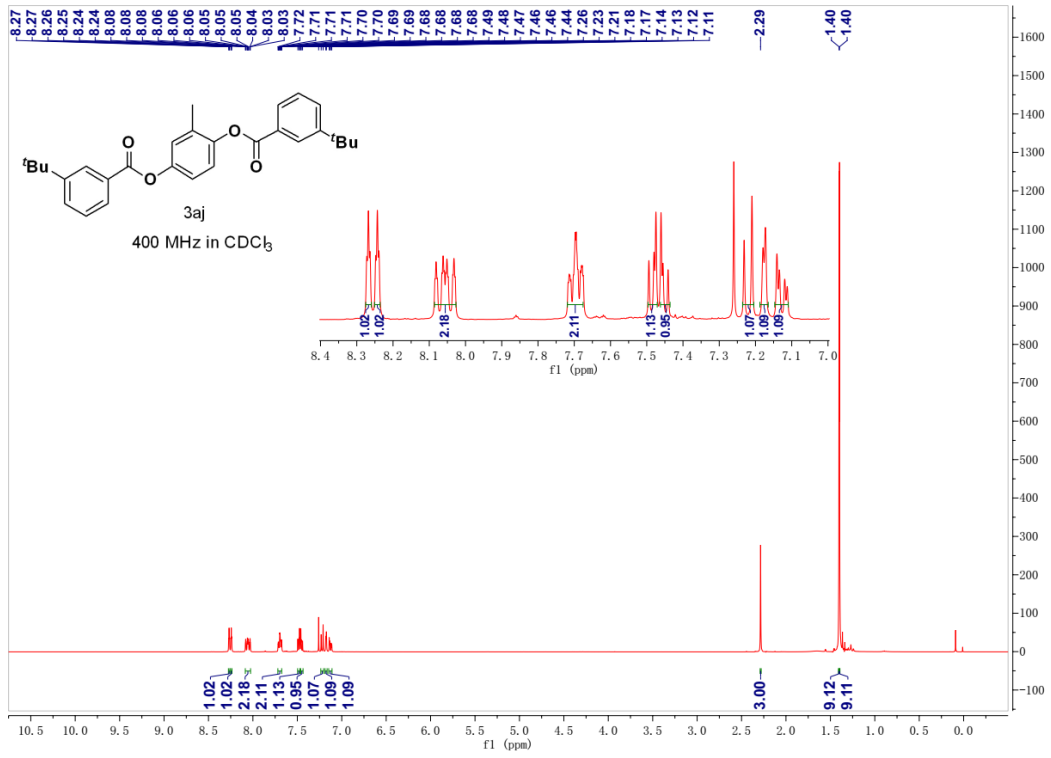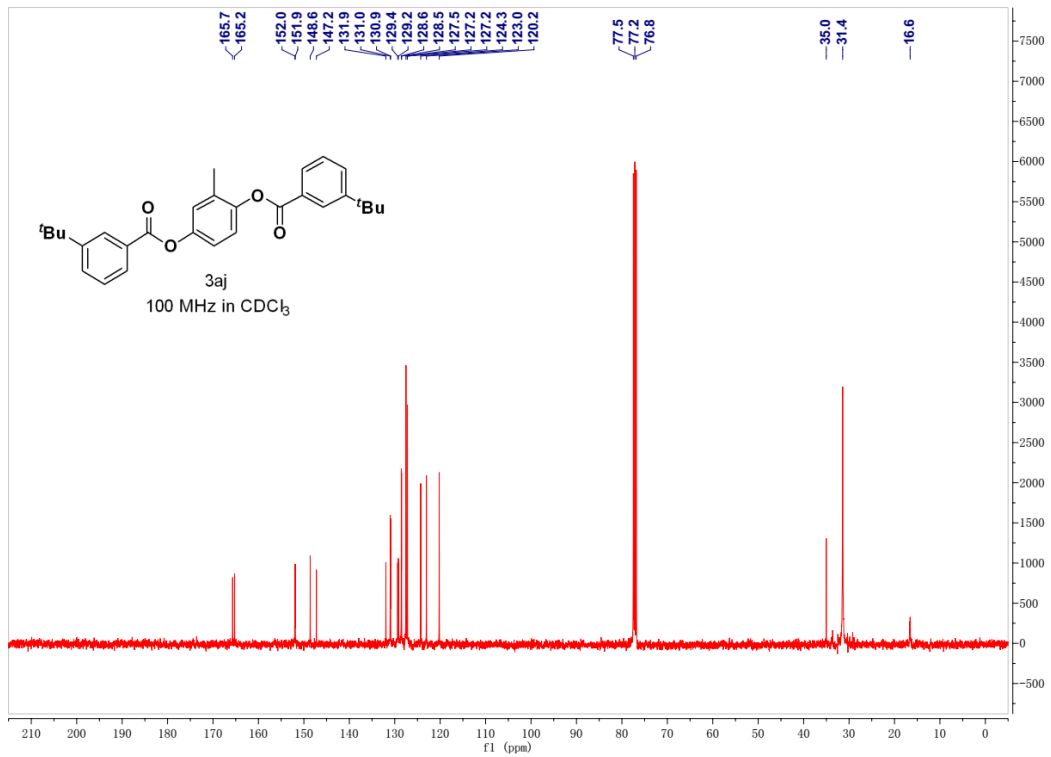

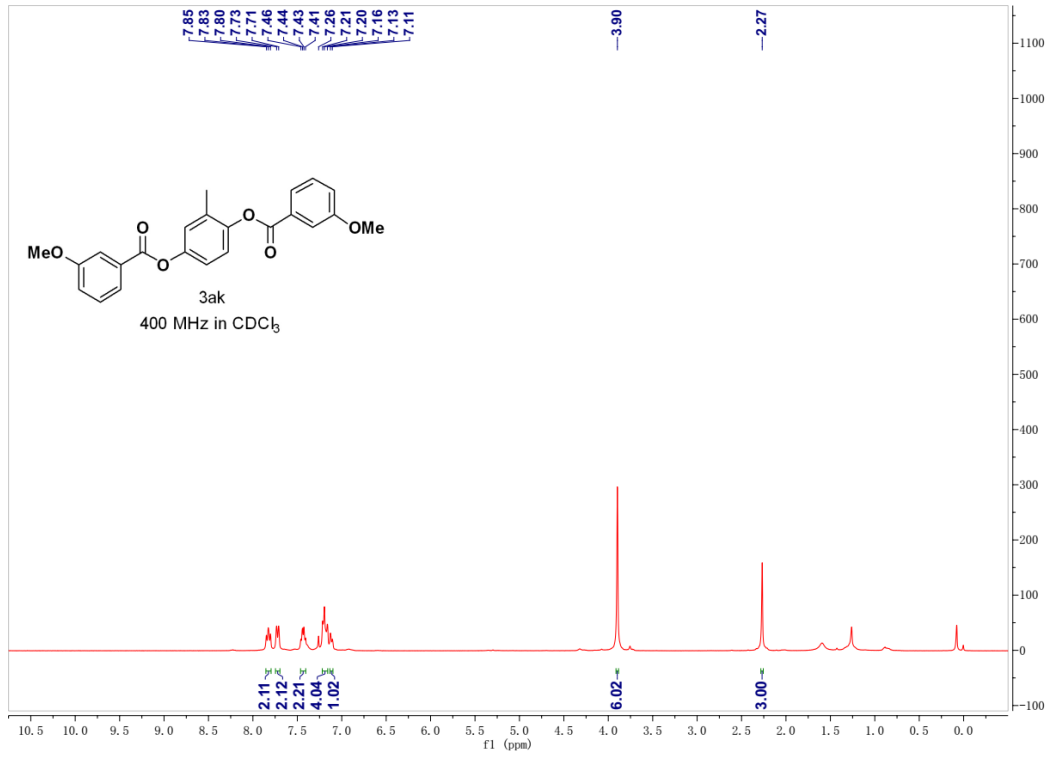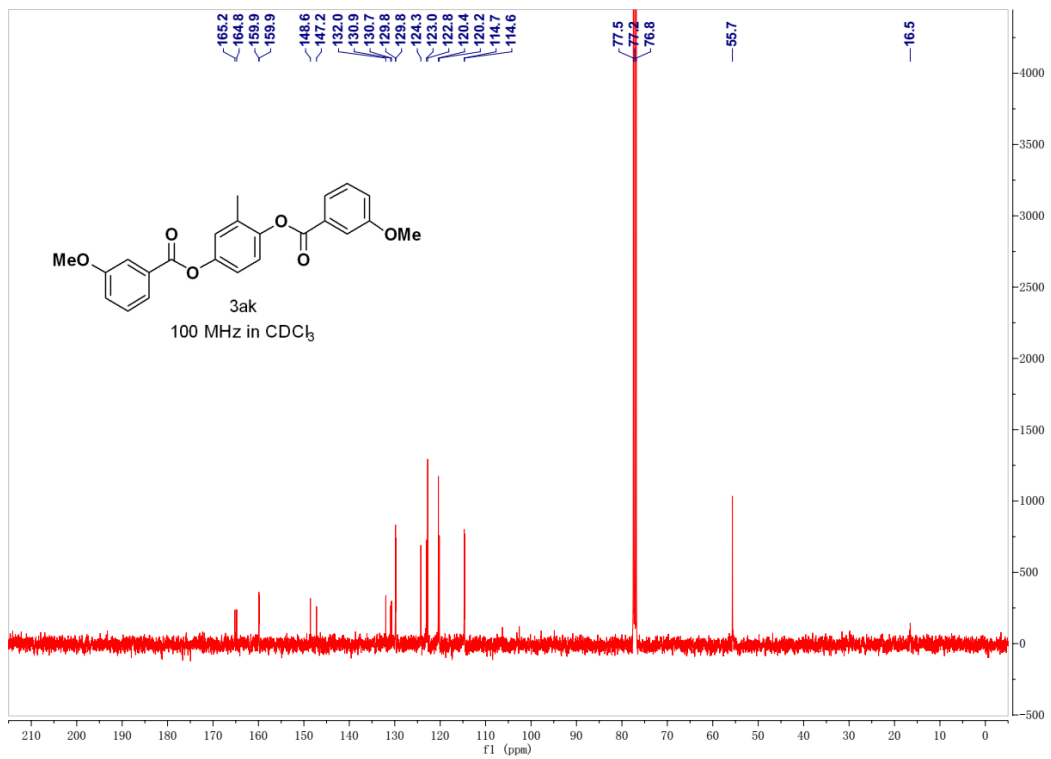

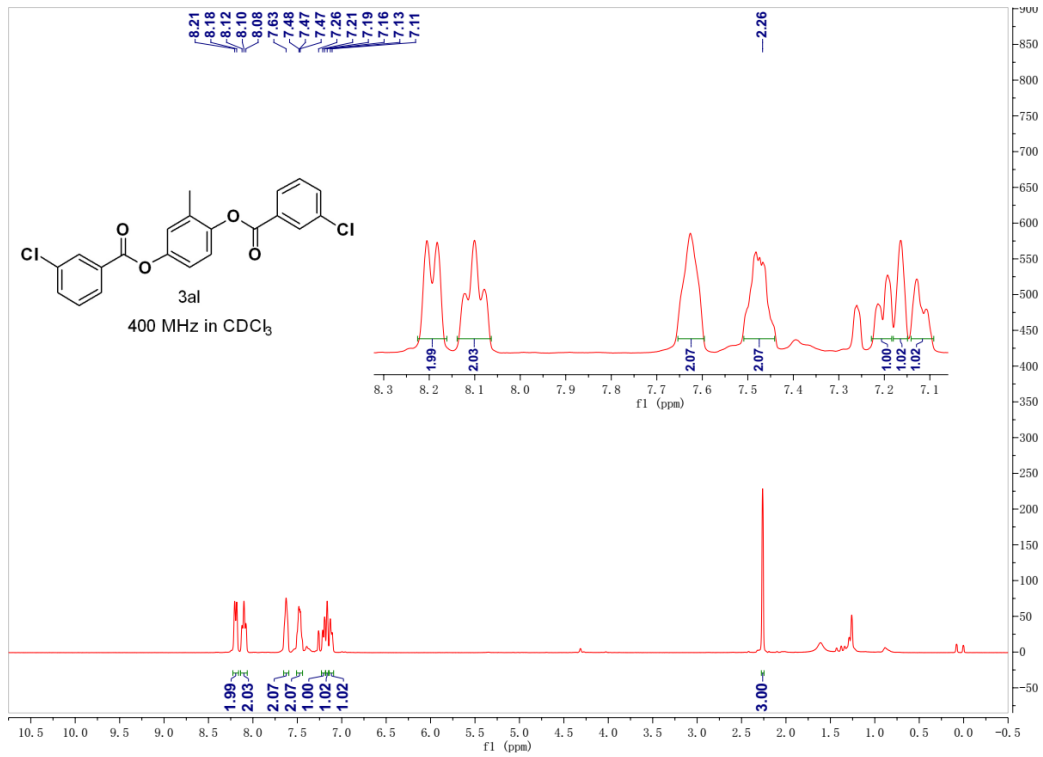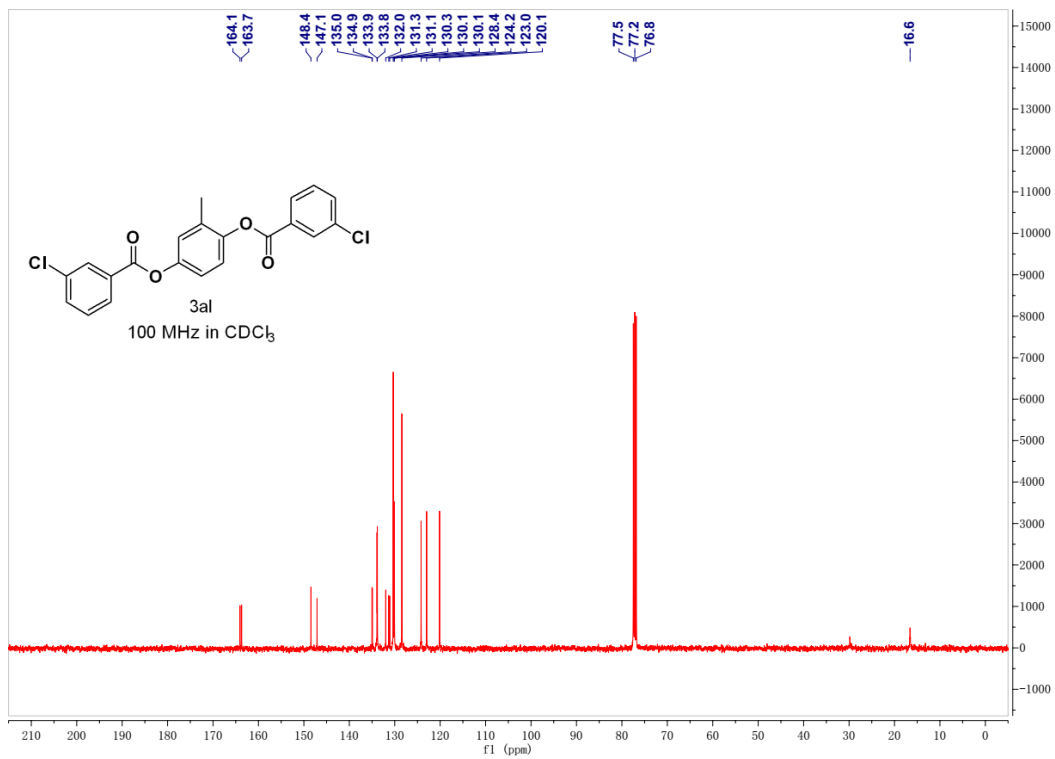



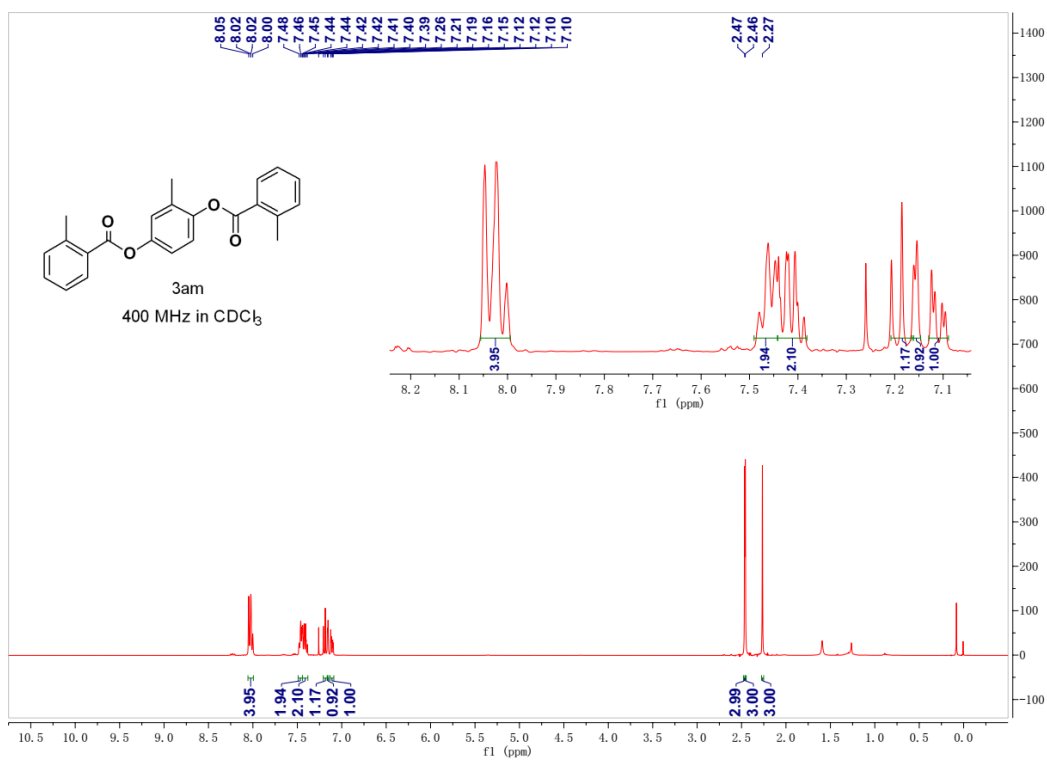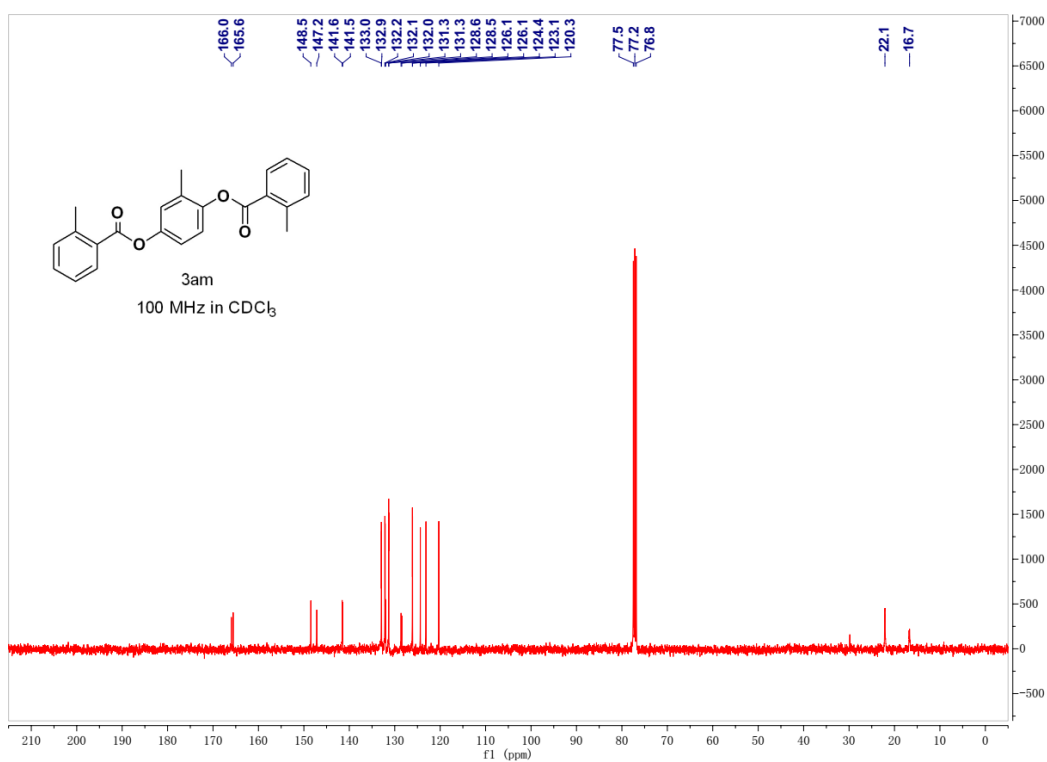

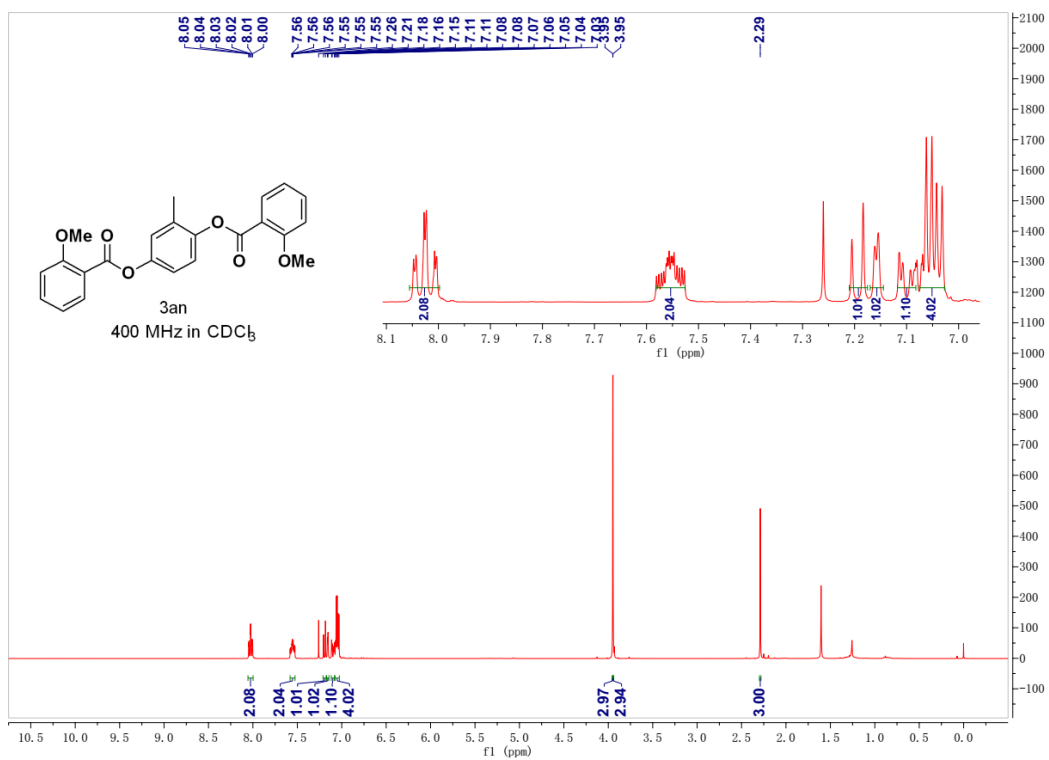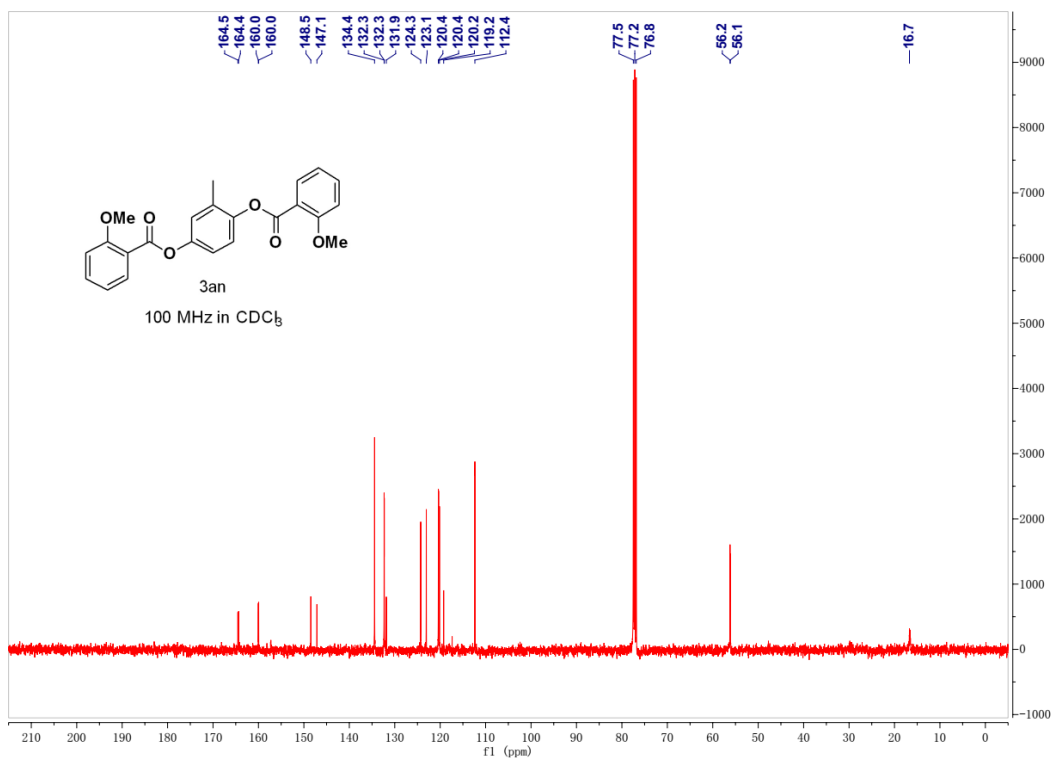

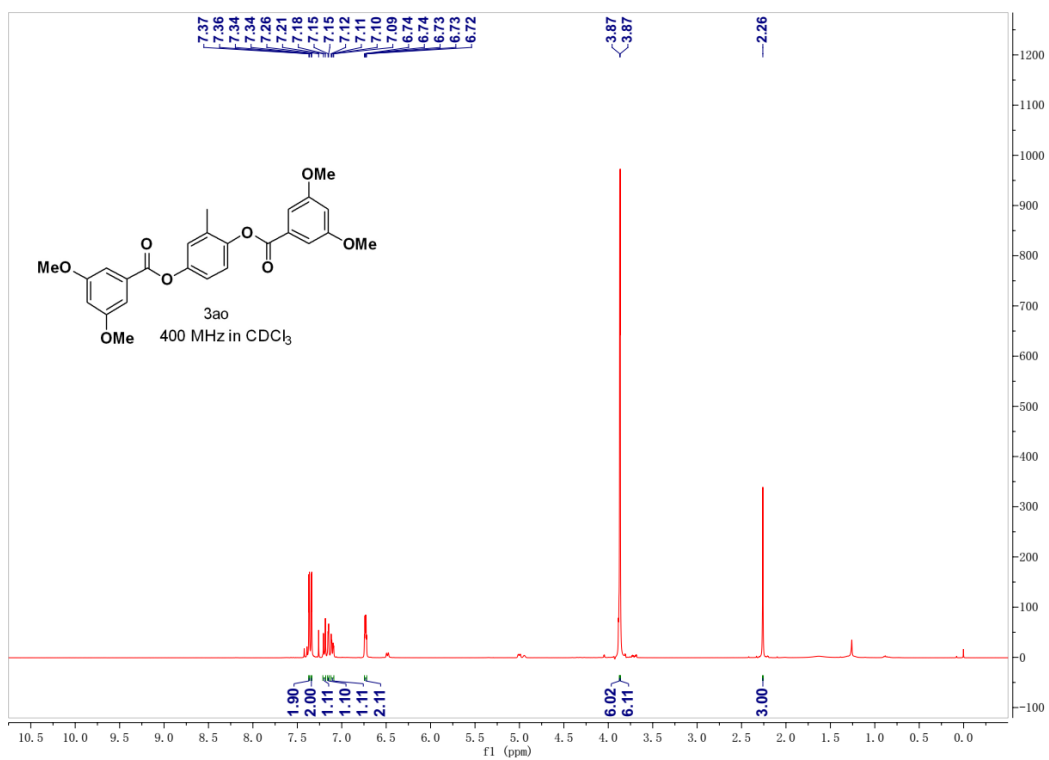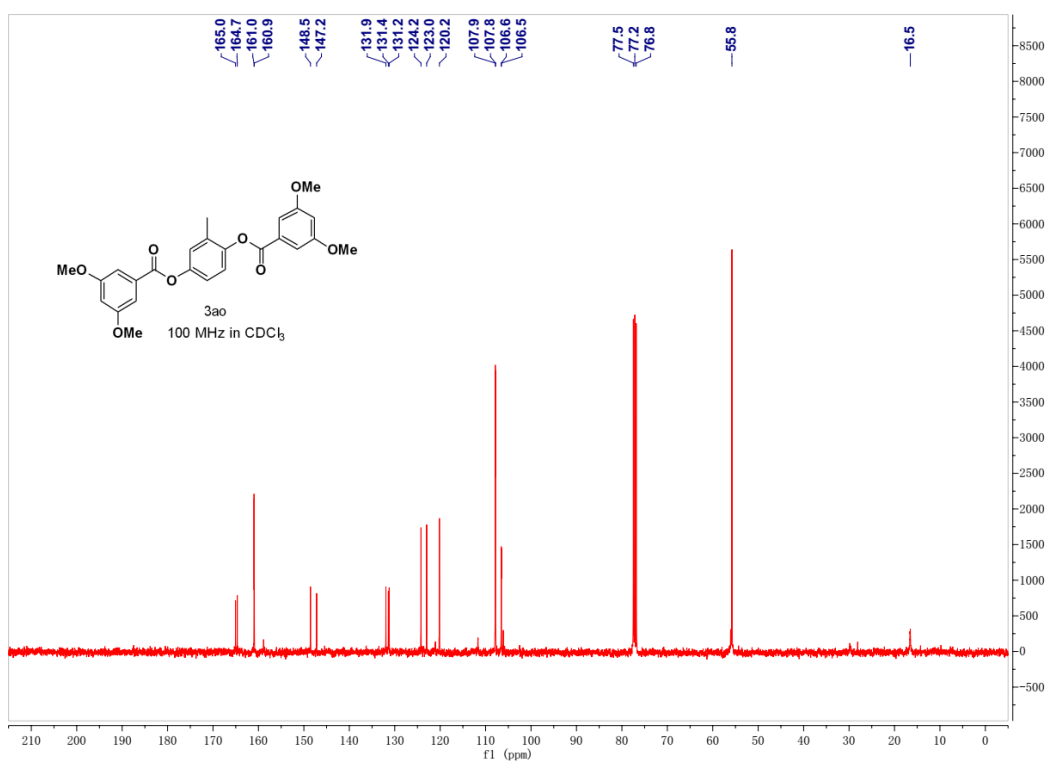

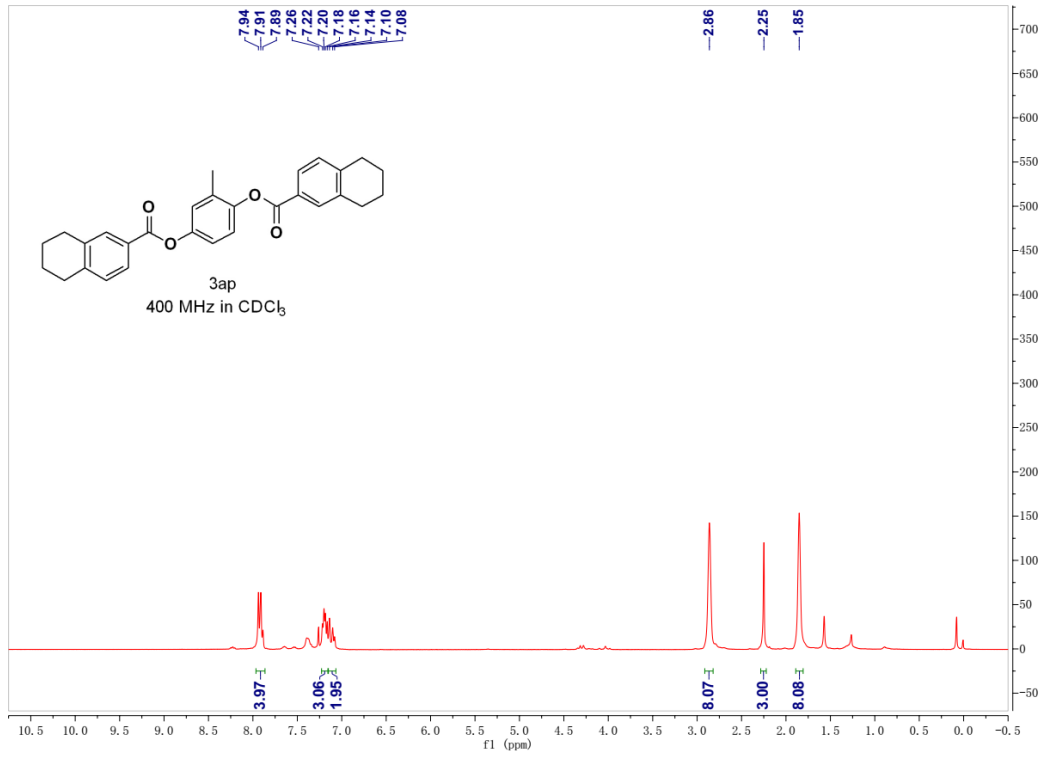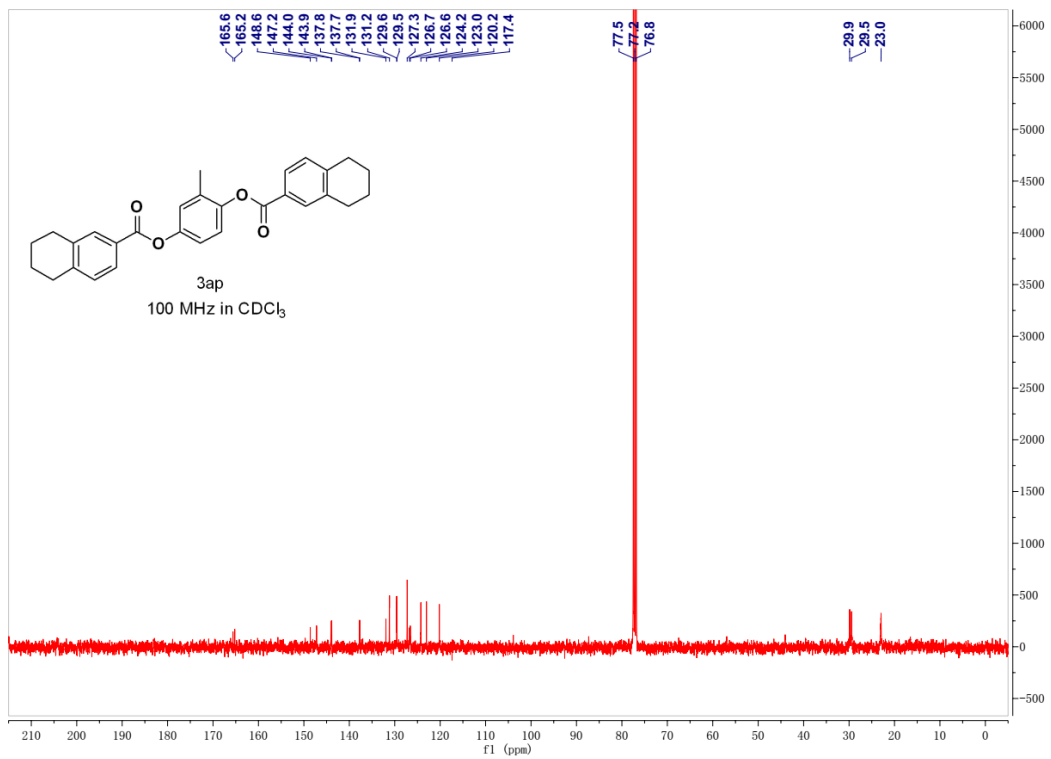

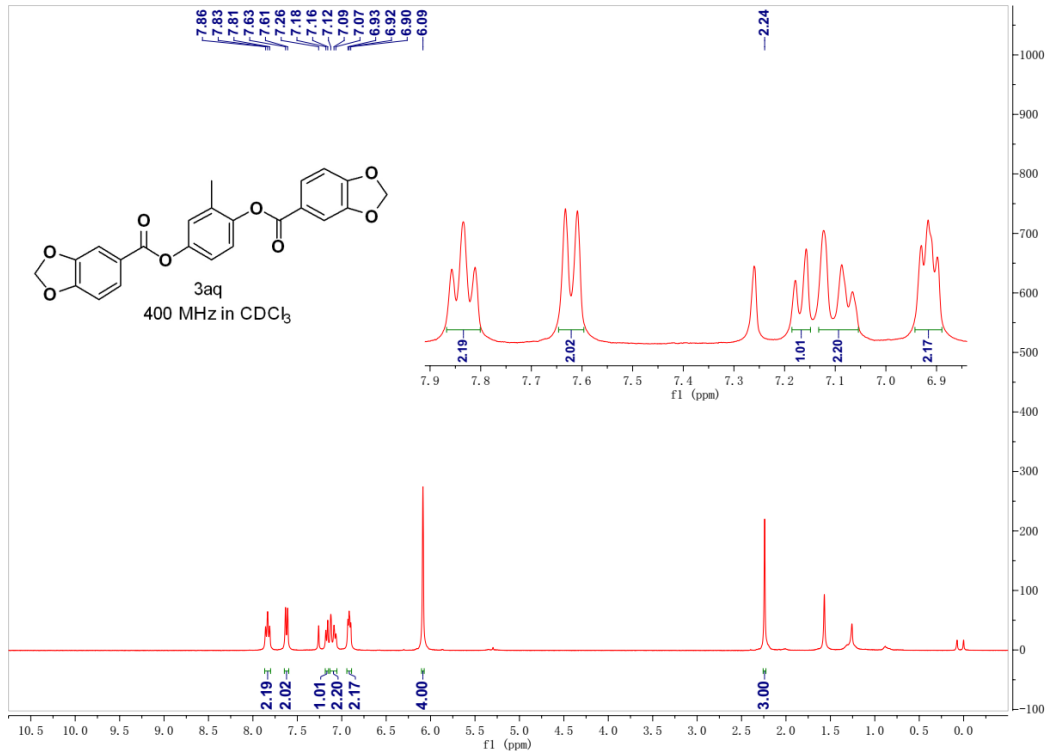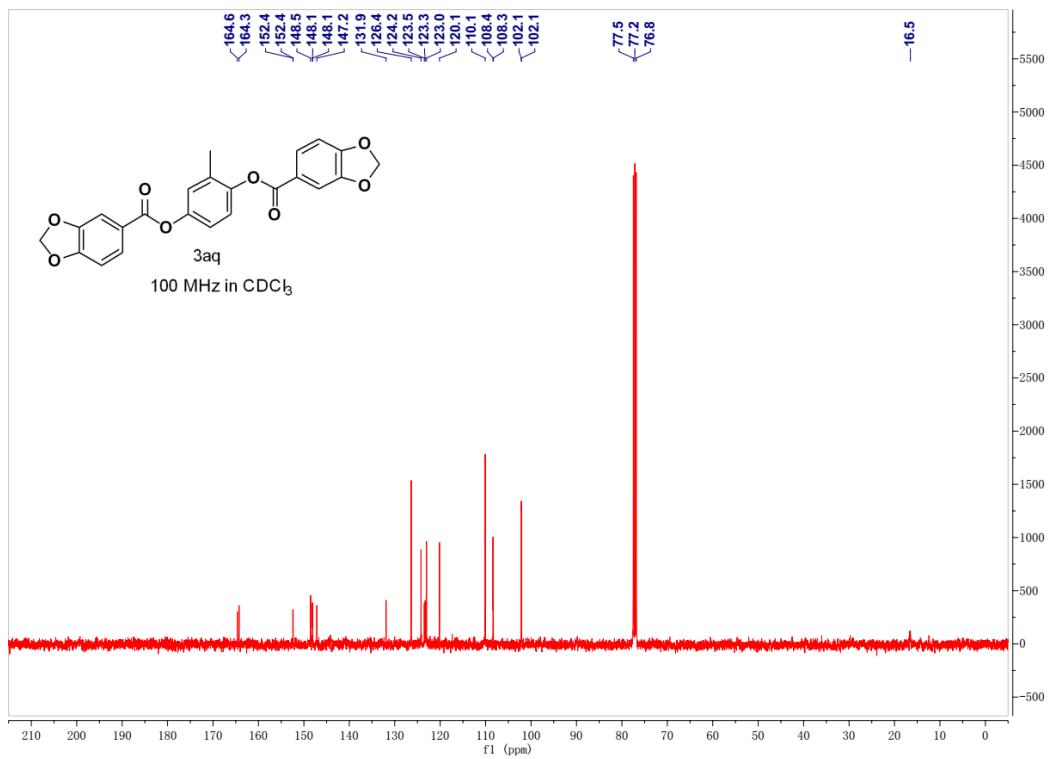

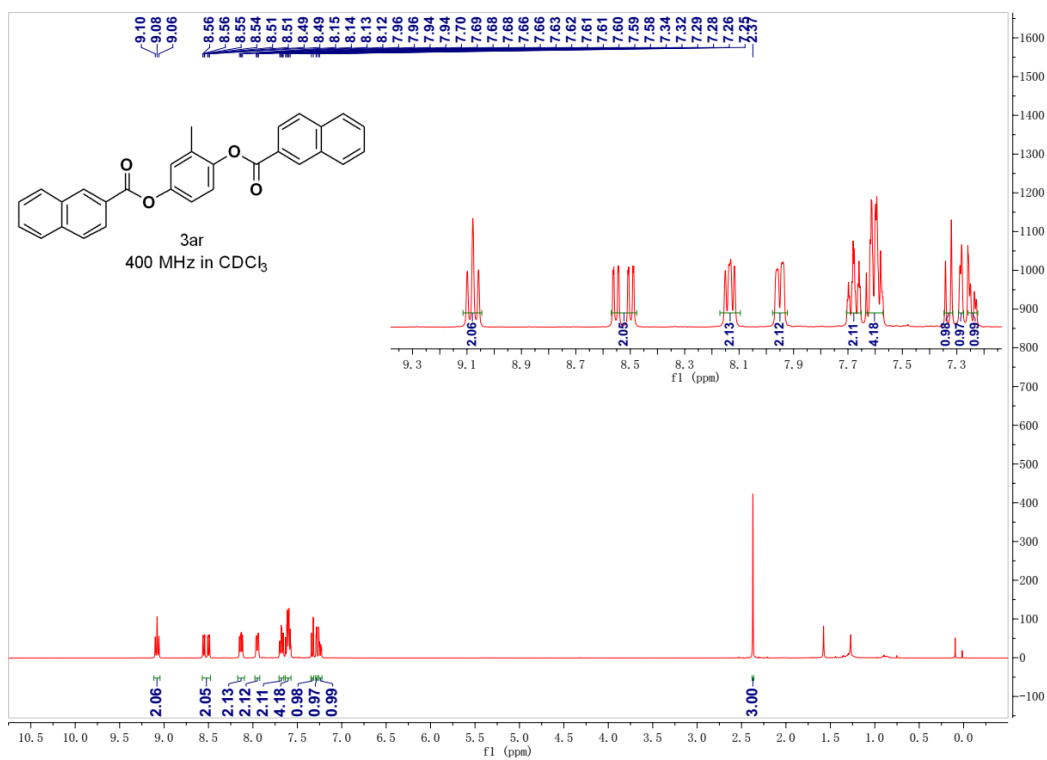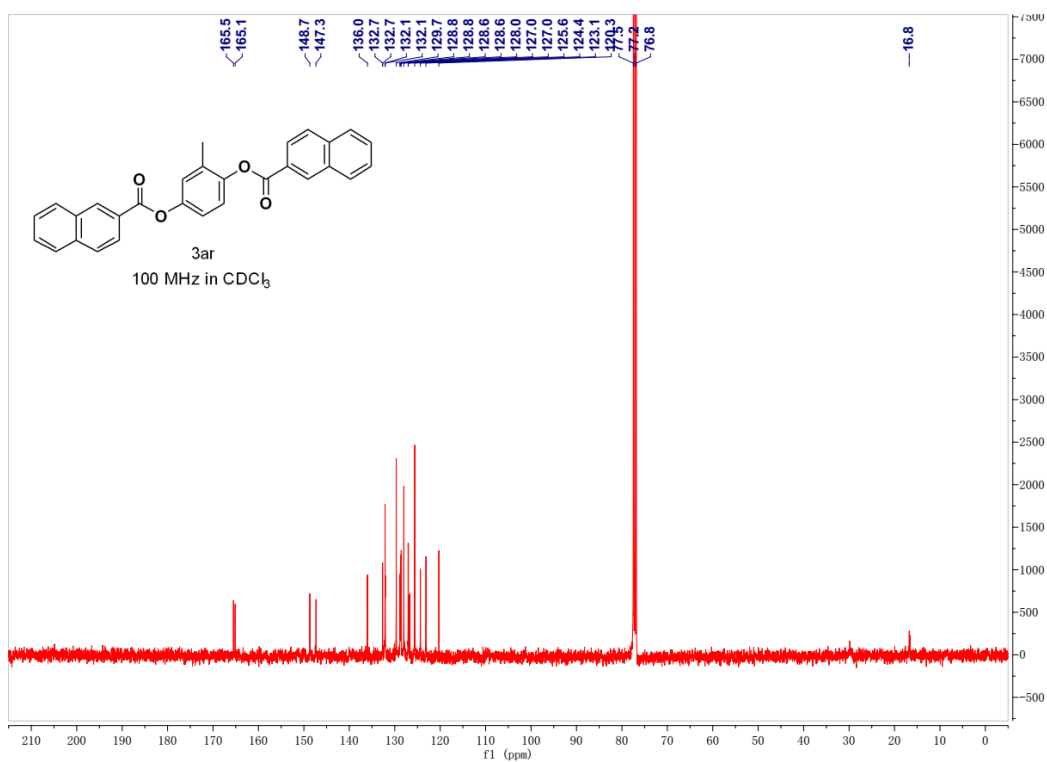



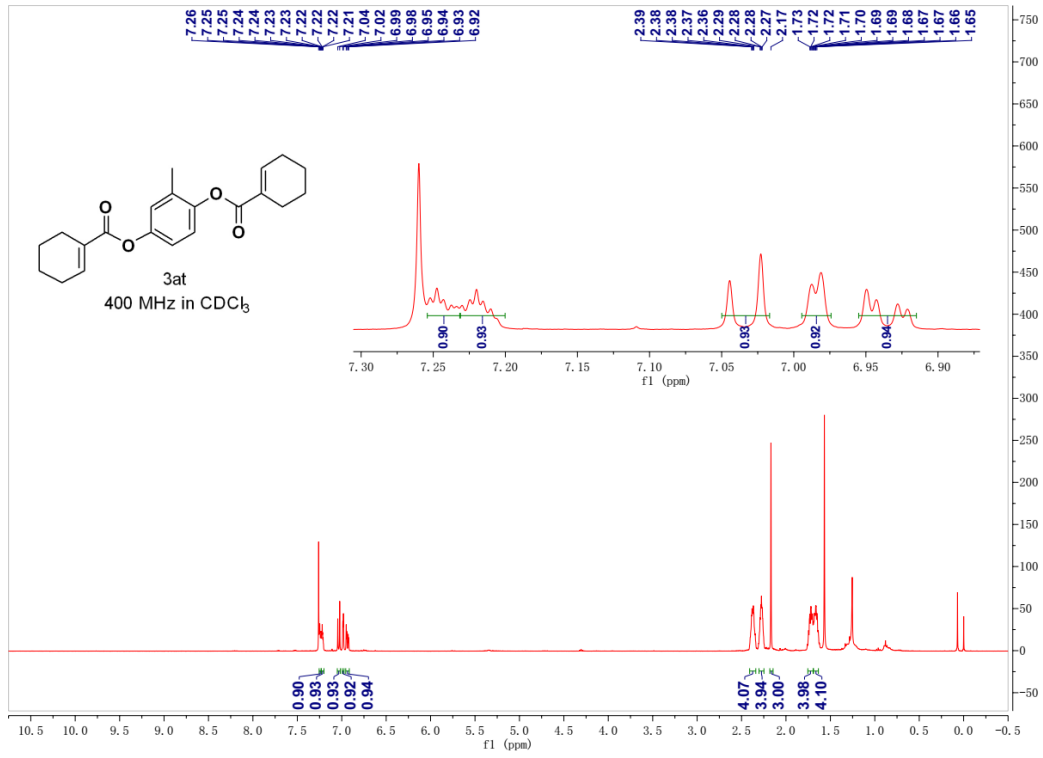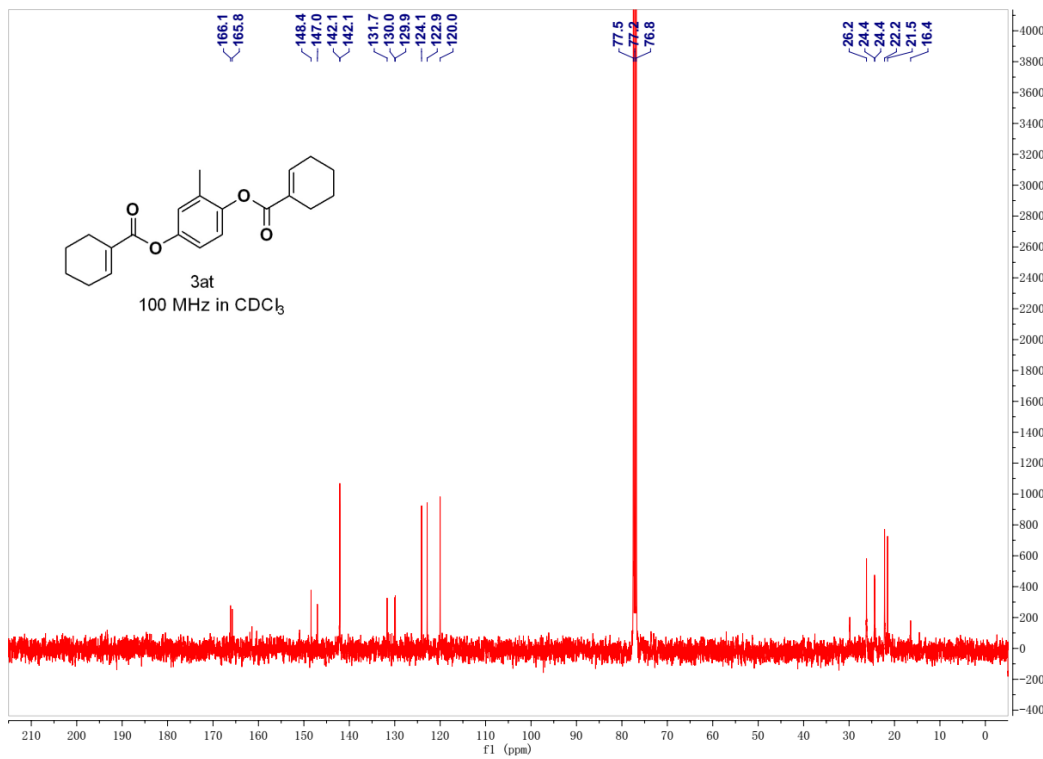



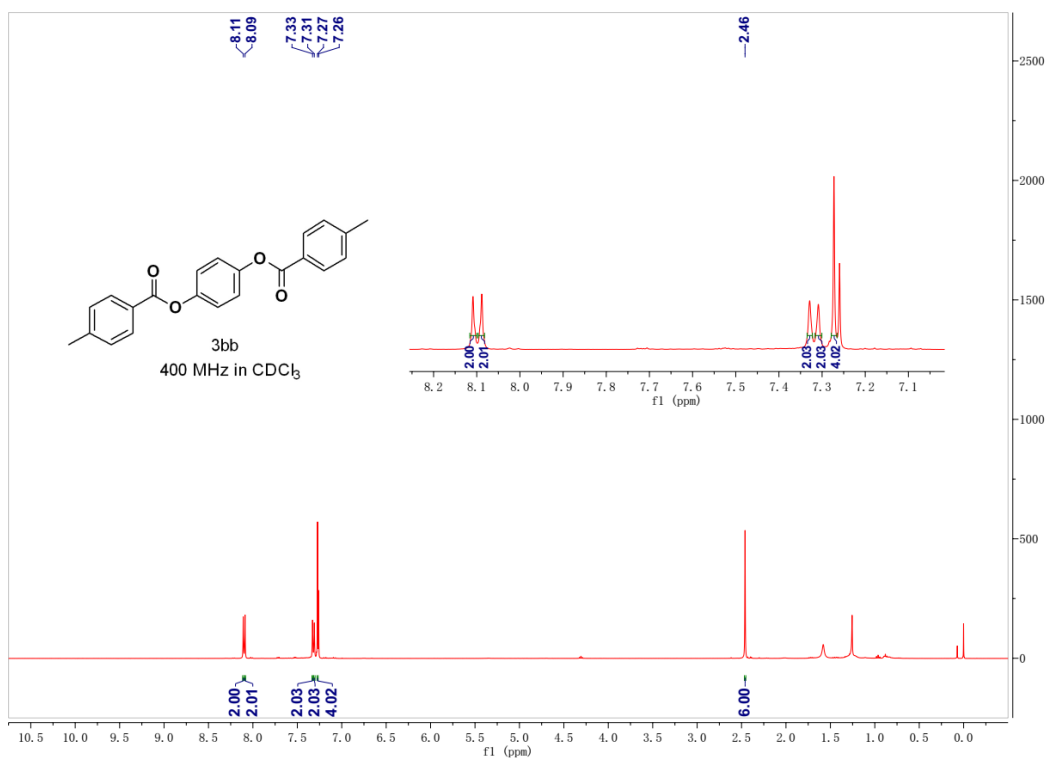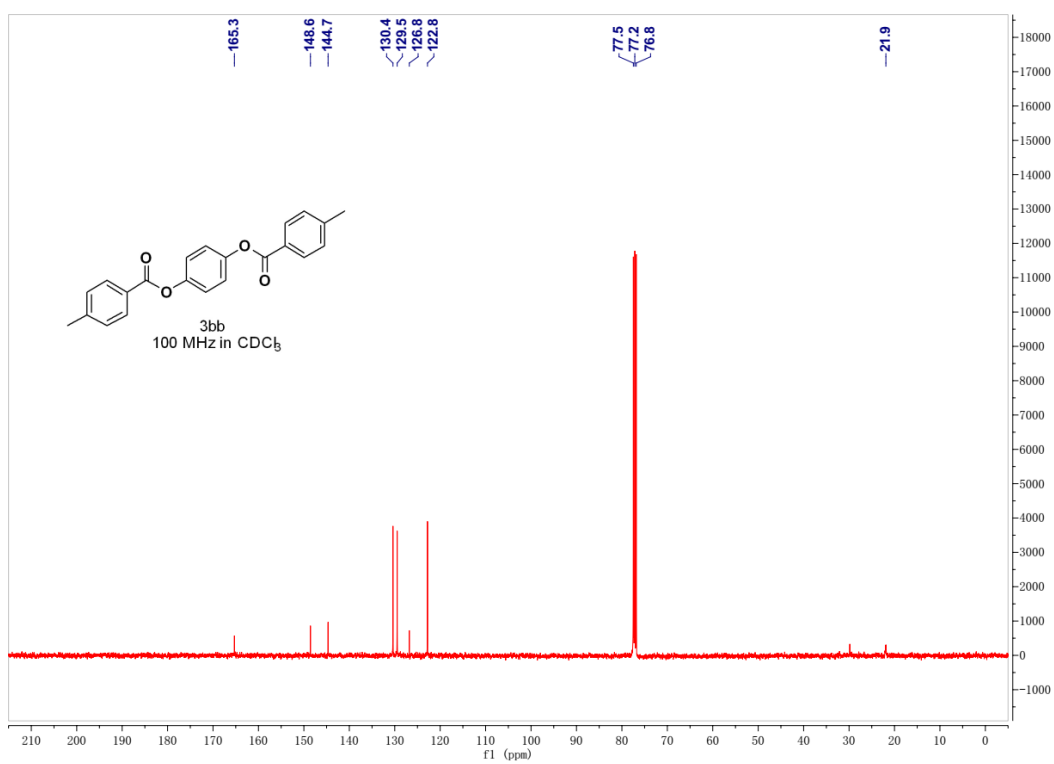

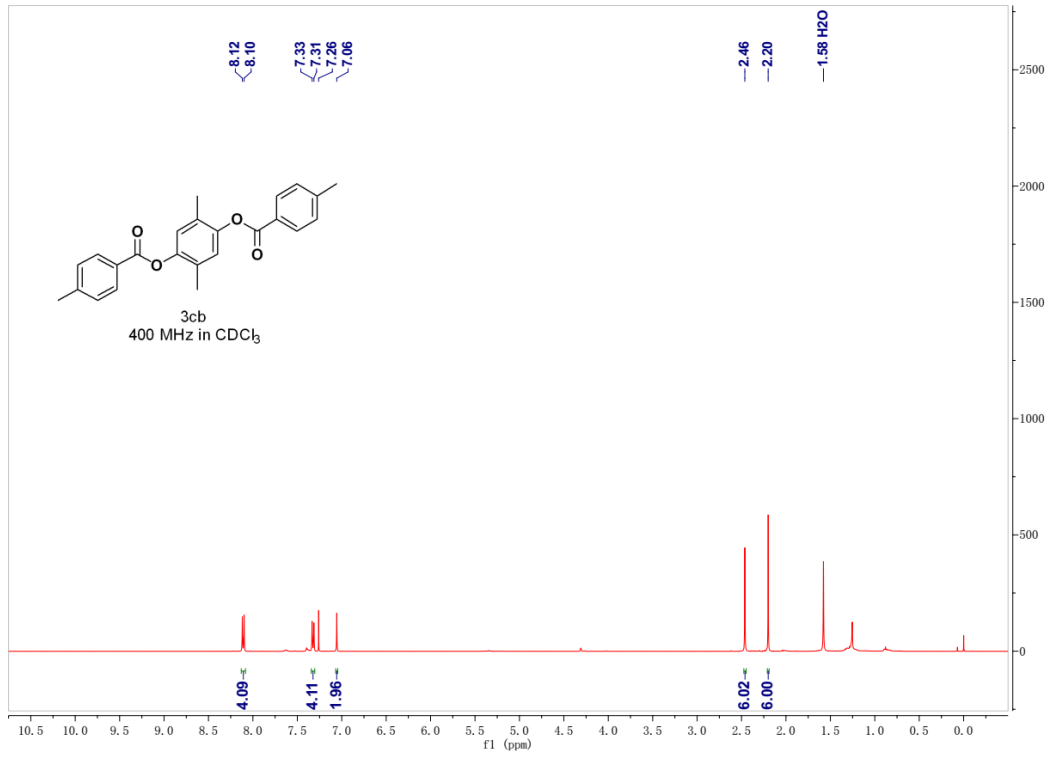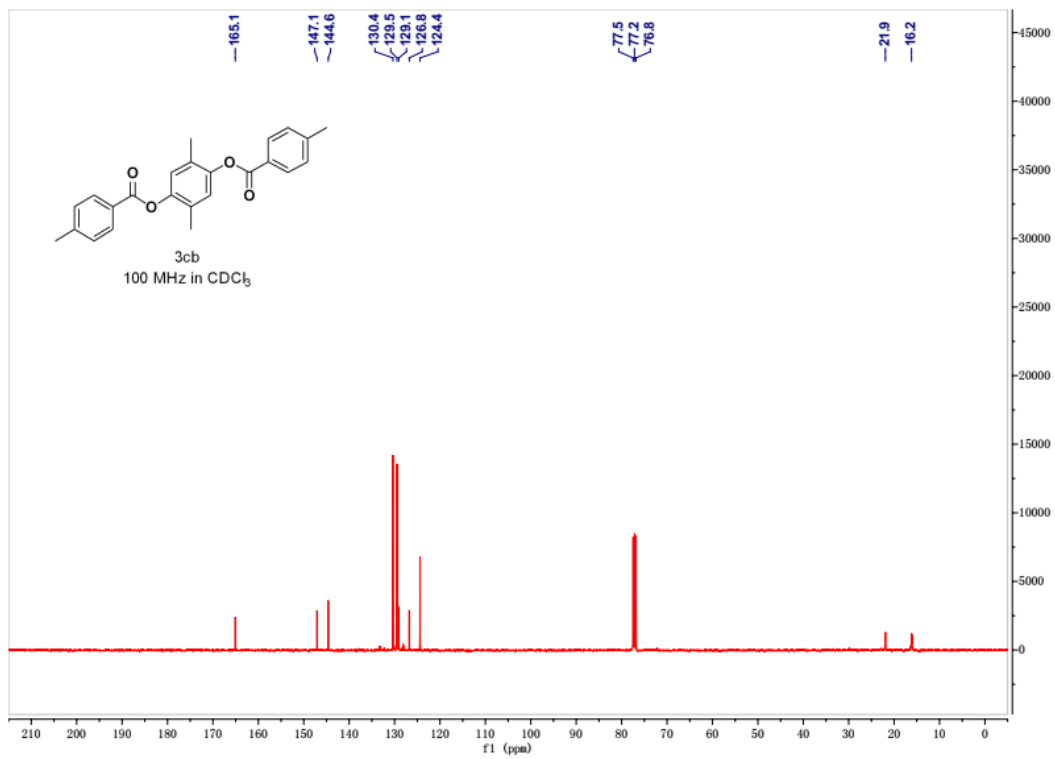

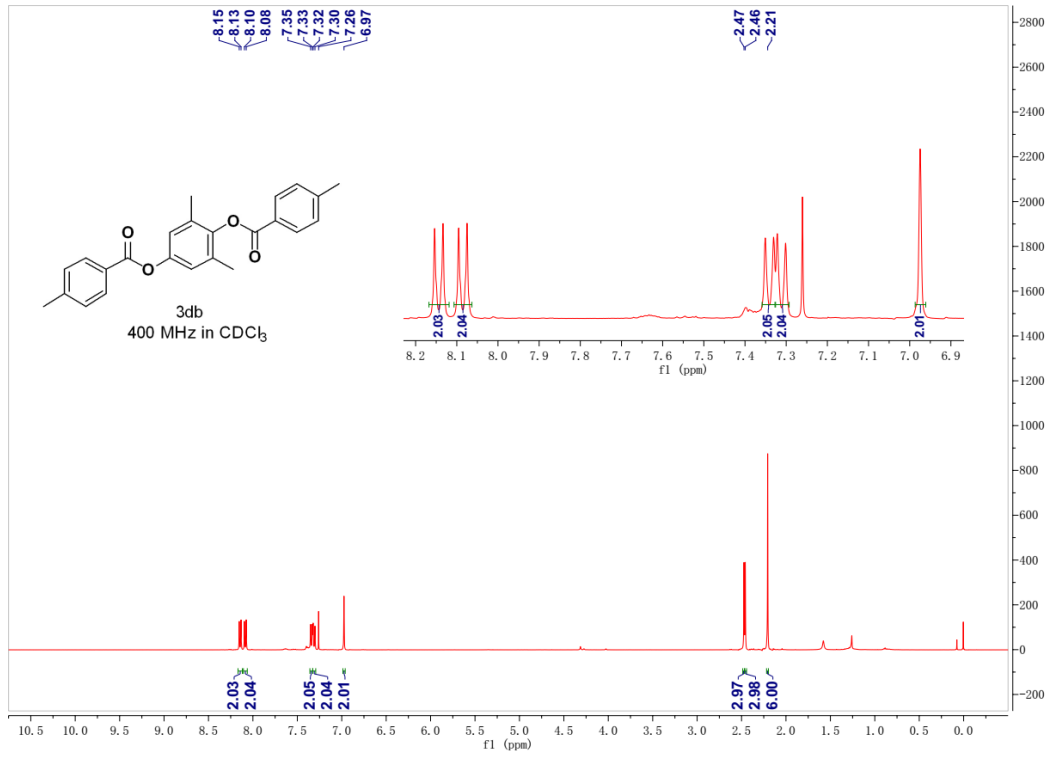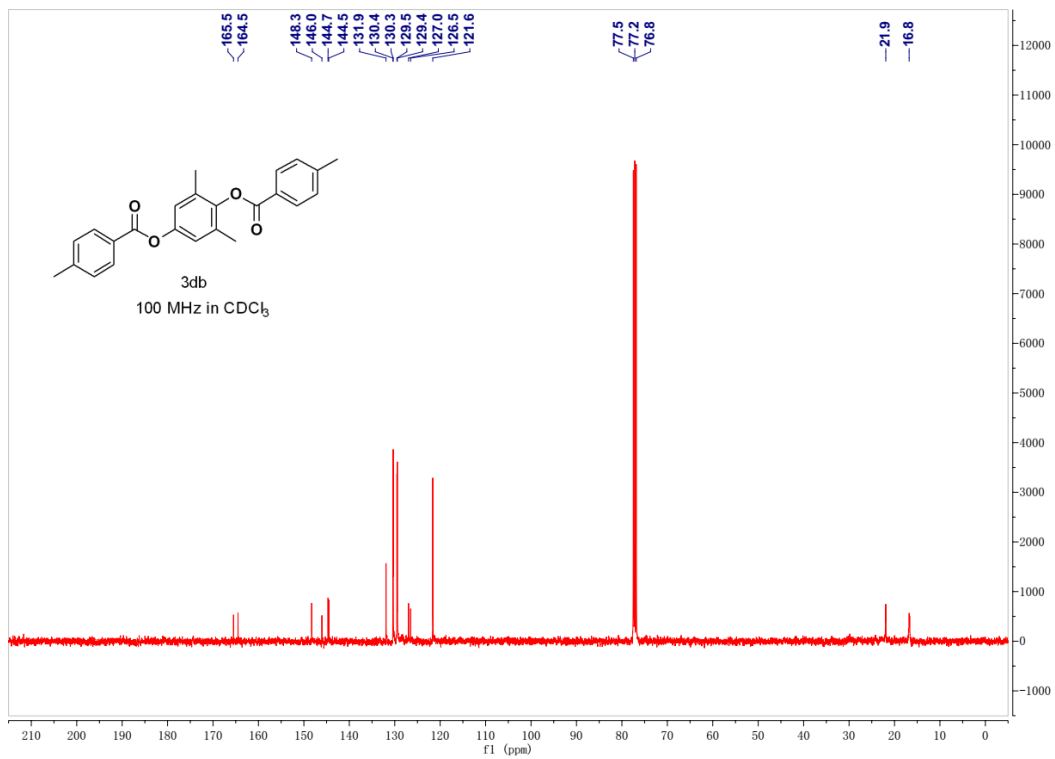

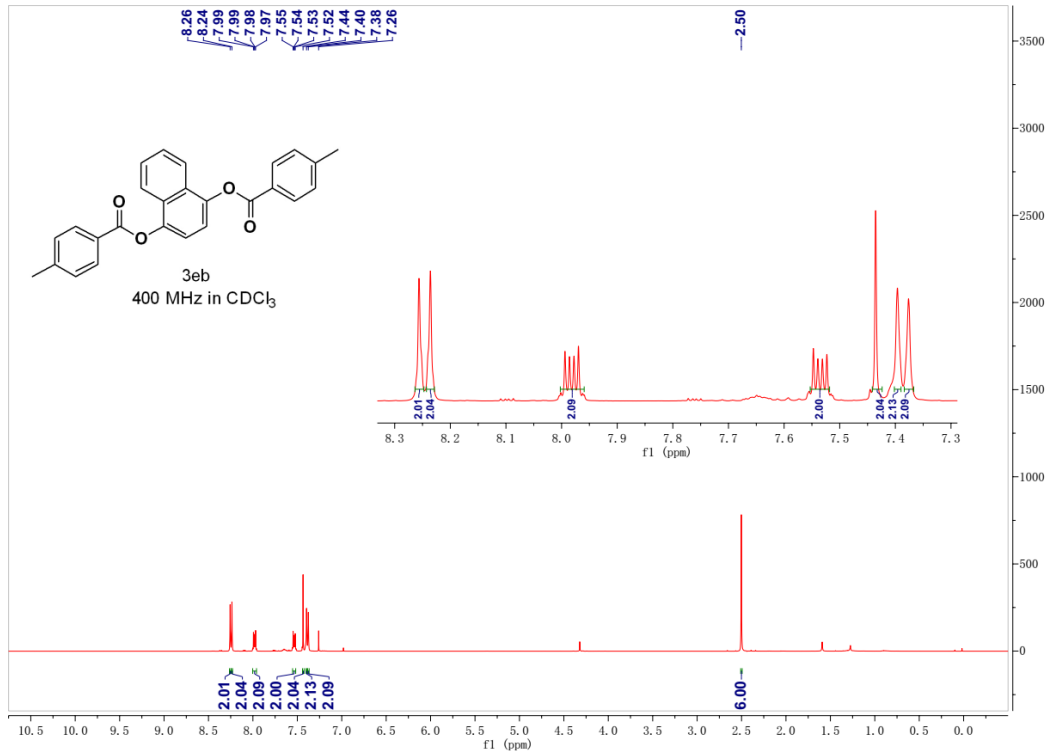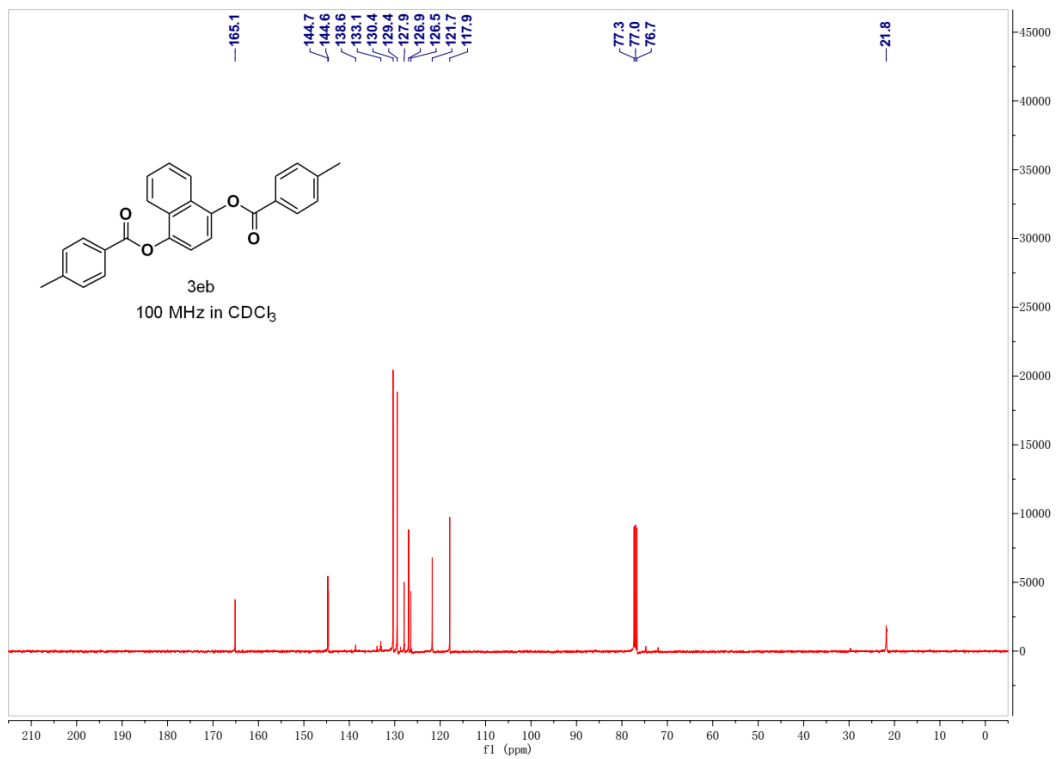

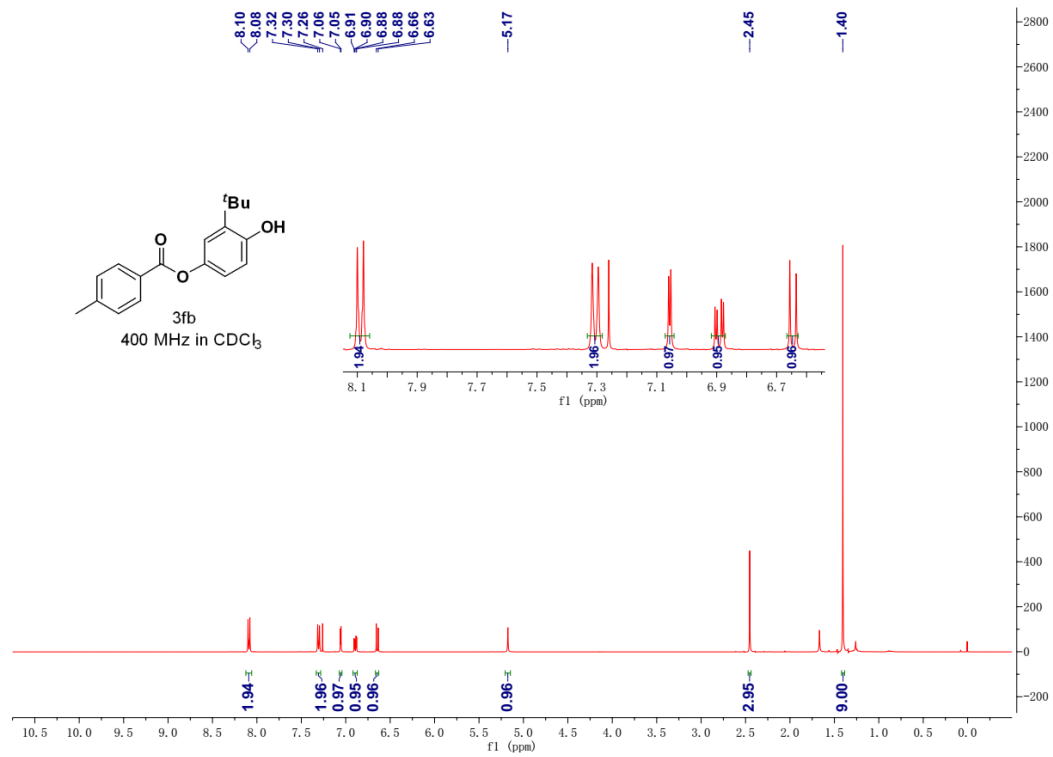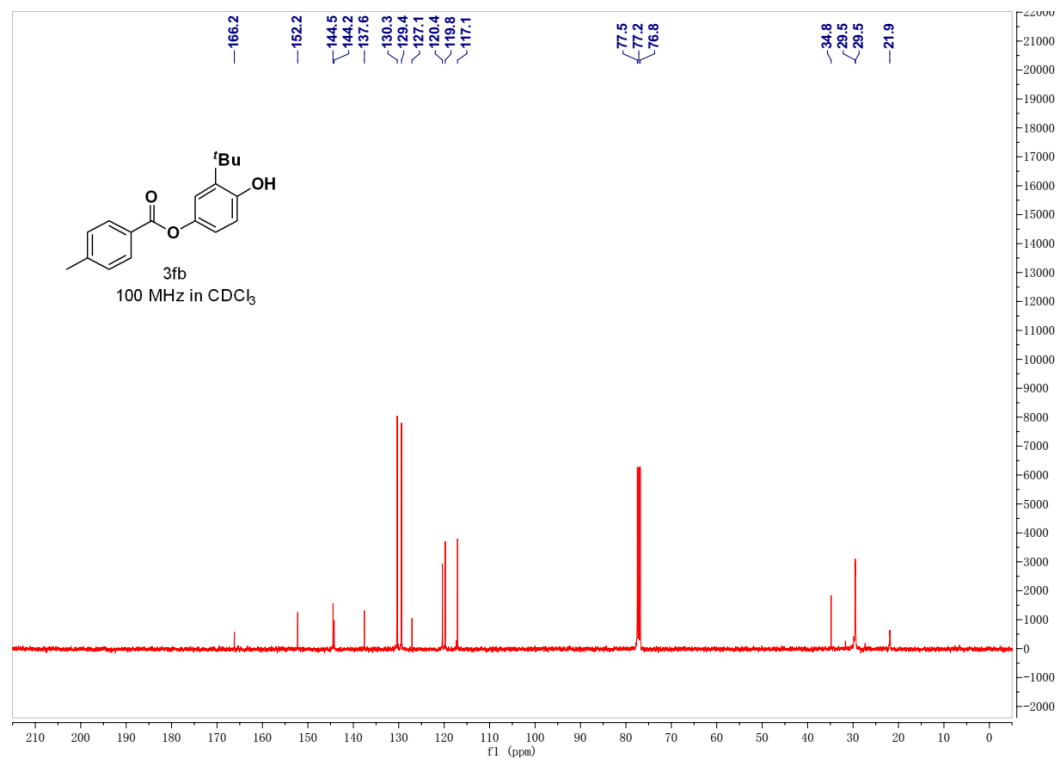

Supplement: d1ob01400e1.pdf [file d1ob01400e1.pdf]
